# Supplementary material for: New Indole-3-Propionic Acid and 5-Methoxy-Indole Carboxylic Acid Derived Hydrazone Hybrids as Multifunctional Neuroprotectors
Source: MDPI journal article supplement (doi:10.3390/antiox12040977), 2023-04-21

## IPA

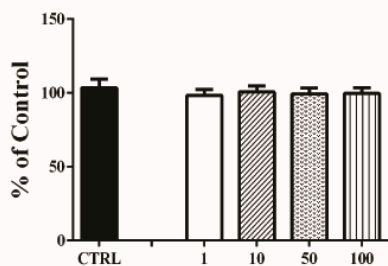

## Compound 3a

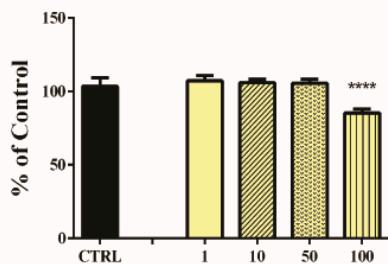

## Compound 3b

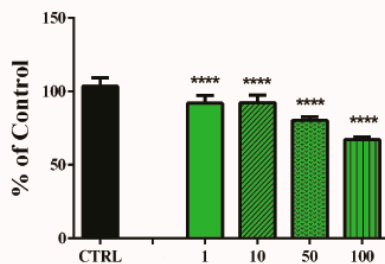

## Compound 3c

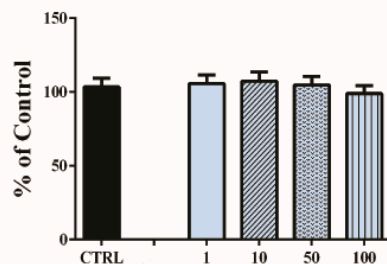

## Compound 3d

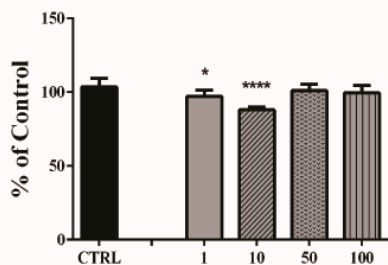

## Compound 3e

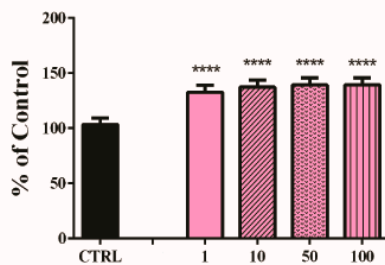

## Compound 3f

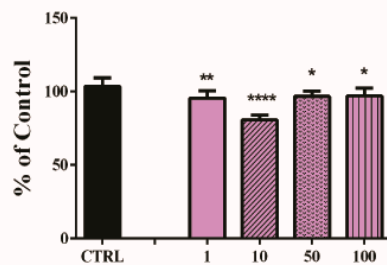

## Compound 5a

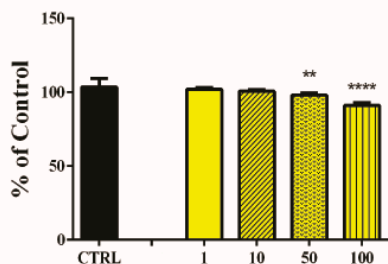

## Compound 5b

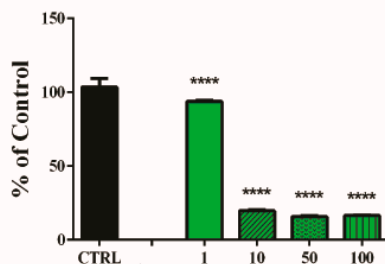

## Compound 5c

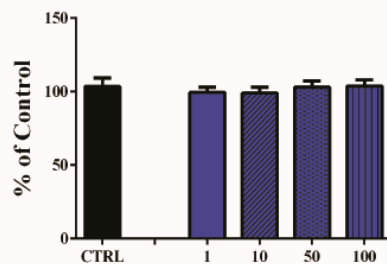

## Compound 5d

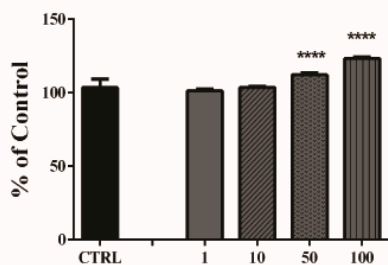

## Compound 5e

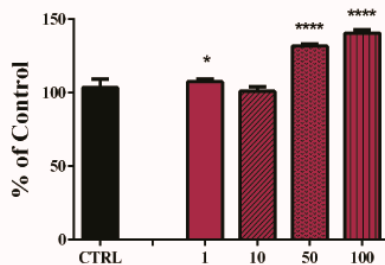

## Compound 5f

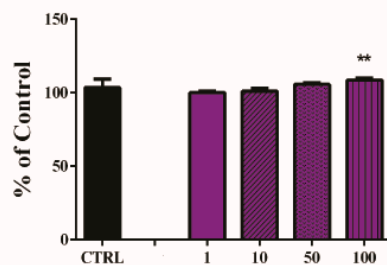

Supplement: s1 [file s1]
