# Supplementary material for: New Indole-3-Propionic Acid and 5-Methoxy-Indole Carboxylic Acid Derived Hydrazone Hybrids as Multifunctional Neuroprotectors
Source: MDPI journal article supplement (doi:10.3390/antiox12040977), 2023-04-21
Supplement: s1 [file s1]

## Supplementary material

# New Indole-3-Propionic Acid and 5-Methoxy-Indole Carboxylic Acid Derived Hydrazone Hybrids as Multifunctional Neuroprotectors

Neda Anastassova <sup>1,\*</sup>, Denitsa Stefanova <sup>2</sup>, Nadya Hristova-Avakumova <sup>3</sup>, Irina Georgieva <sup>4</sup>, Magdalena Kondeva-Burdina <sup>2</sup>, Miroslav Rangelov <sup>1</sup>, Nadezhda Todorova <sup>5</sup>, Rumiana Tzoneva <sup>4</sup> and Denitsa Yancheva <sup>1,\*</sup>

<sup>1</sup> Institute of Organic Chemistry with Centre of Phytochemistry, Bulgarian Academy of Sciences, Acad. G. Bonchev Str., Building 9, 1113 Sofia, Bulgaria

<sup>2</sup> Laboratory of Drug Metabolism and Drug Toxicity, Department of Pharmacology, Pharmacotherapy and Toxicology, Faculty of Pharmacy, Medical University-Sofia, 2 Dunav Str., 1000 Sofia, Bulgaria

<sup>3</sup> Department of Medical Physics and Biophysics, Faculty of Medicine, Medical University of Sofia, 2 Zdrave Str., 1431 Sofia, Bulgaria

<sup>4</sup> Laboratory of Transmembrane Signaling, Institute of Biophysics and Biomedical Engineering, Bulgarian Academy of Sciences, Acad. G. Bonchev Str., Block 21, 1113 Sofia, Bulgaria

<sup>5</sup> Institute of Biodiversity and Ecosystem Research, Bulgarian Academy of Sciences, 2 Gagarin Str., 1113 Sofia, Bulgaria

\* Correspondence: neda.anastassova@orgchm.bas.bg (N.A.); denitsa.pantaleeva@orgchm.bas.bg (D.Y.)

## Contents

1. <sup>1</sup>H NMR and <sup>13</sup>C NMR spectra of the synthesized compounds
2. ATR-IR spectra of the synthesized compounds
3. UV-Vis spectra absorbance spectra of the: control - standard orange-red Fe(II) – 1,10 Phenantroline complex; the tested hydrazone compounds
4. UV spectra of selected compounds in buffers with pH 2, 4.5, 7.4 and 8.5 measured at the initial point (0 min) and after 1, 2, 3 and 24 h

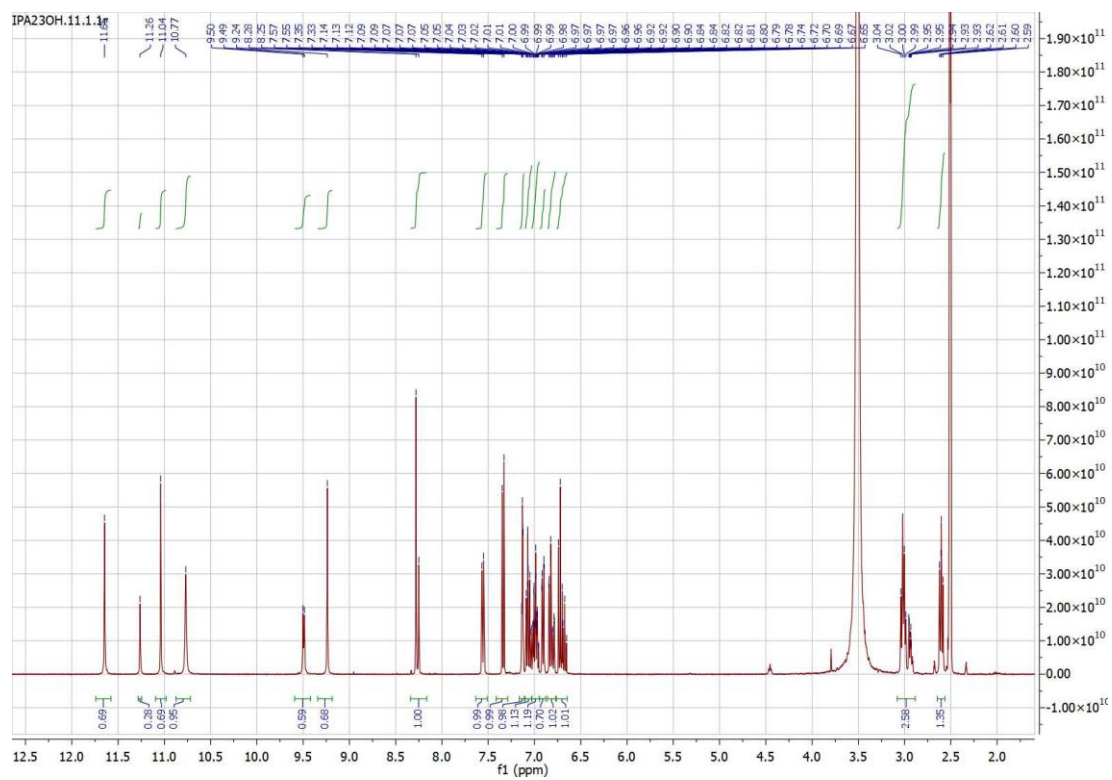

Figure S1.  $^1\text{H}$  NMR spectrum of **2** (400 MHz,  $\text{DMSO-d}_6$ )

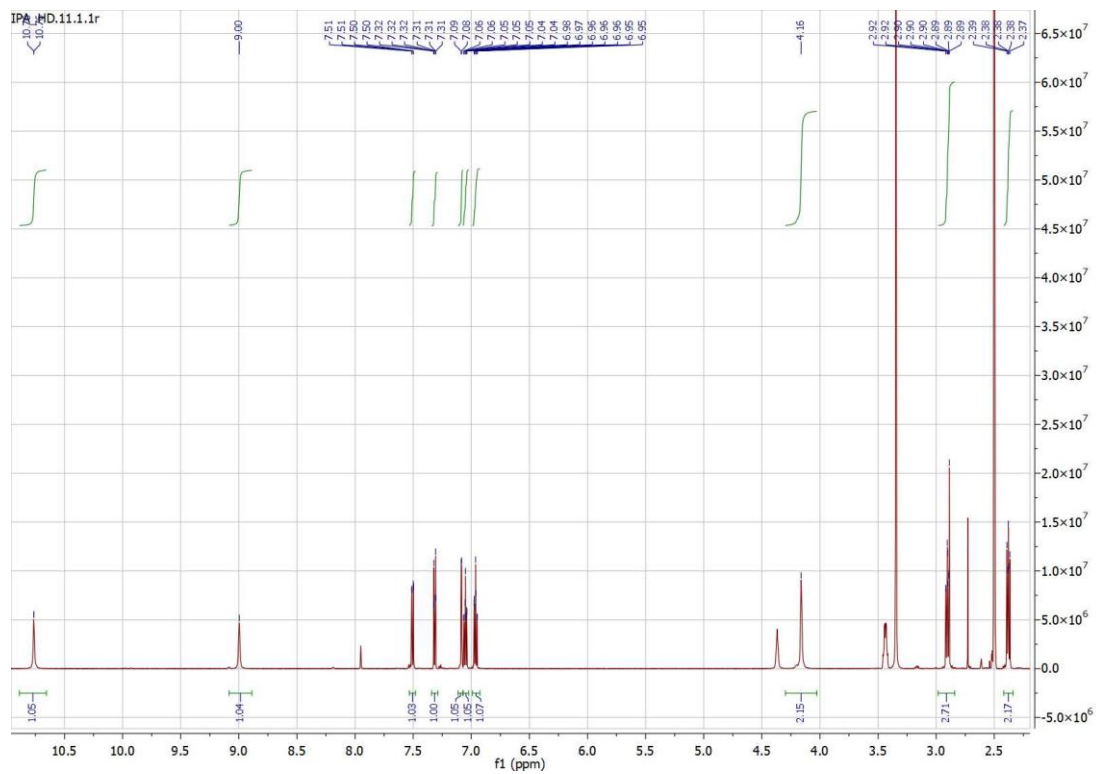

Figure S2.  $^1\text{H}$  NMR spectrum of **(3a)** (400 MHz,  $\text{DMSO-d}_6$ )

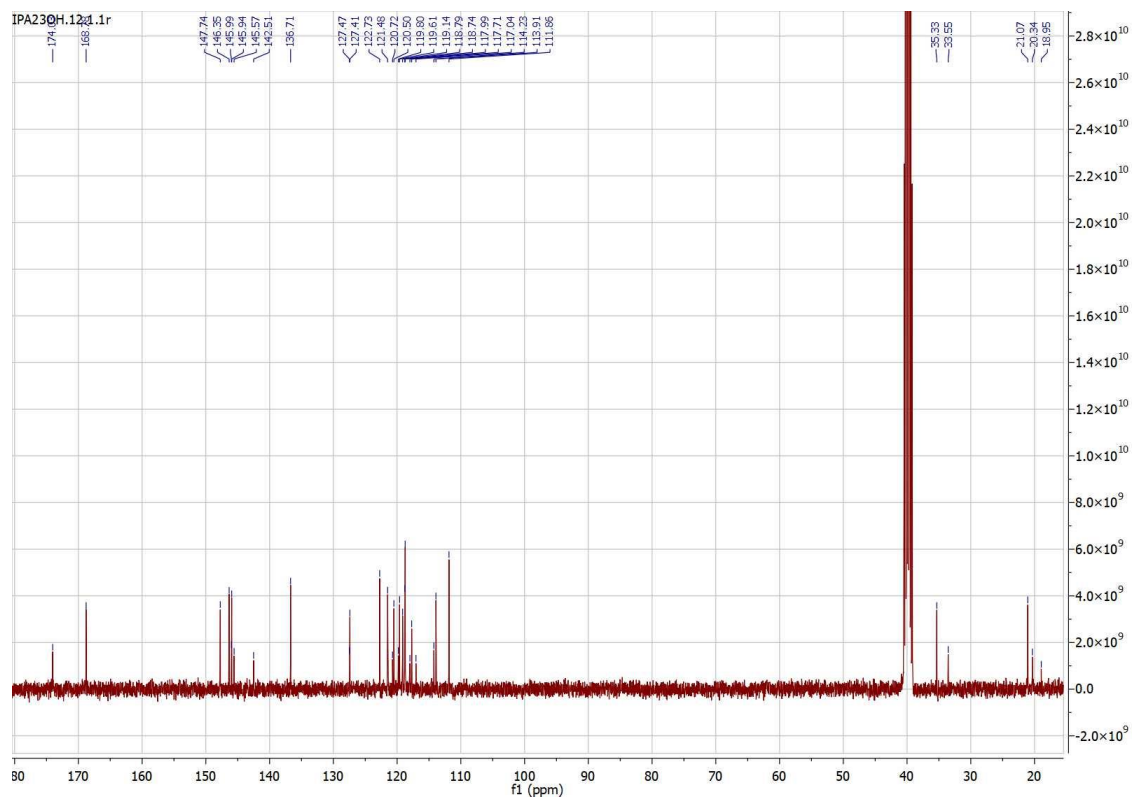

Figure S3.  $^{13}\text{C}$  NMR spectrum of **3a** (151 MHz,  $\text{DMSO-d}_6$ ).

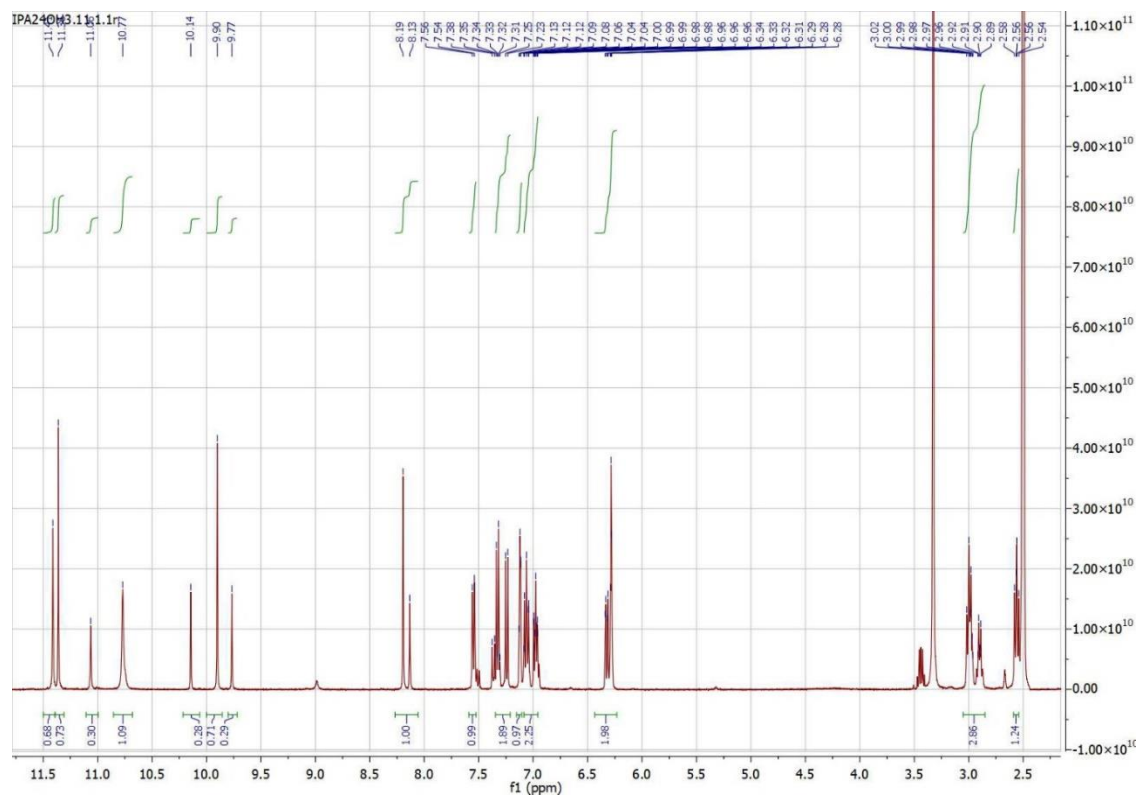

Figure S4.  $^1\text{H}$  NMR spectrum of (**3c**) (600 MHz,  $\text{DMSO-d}_6$ ).



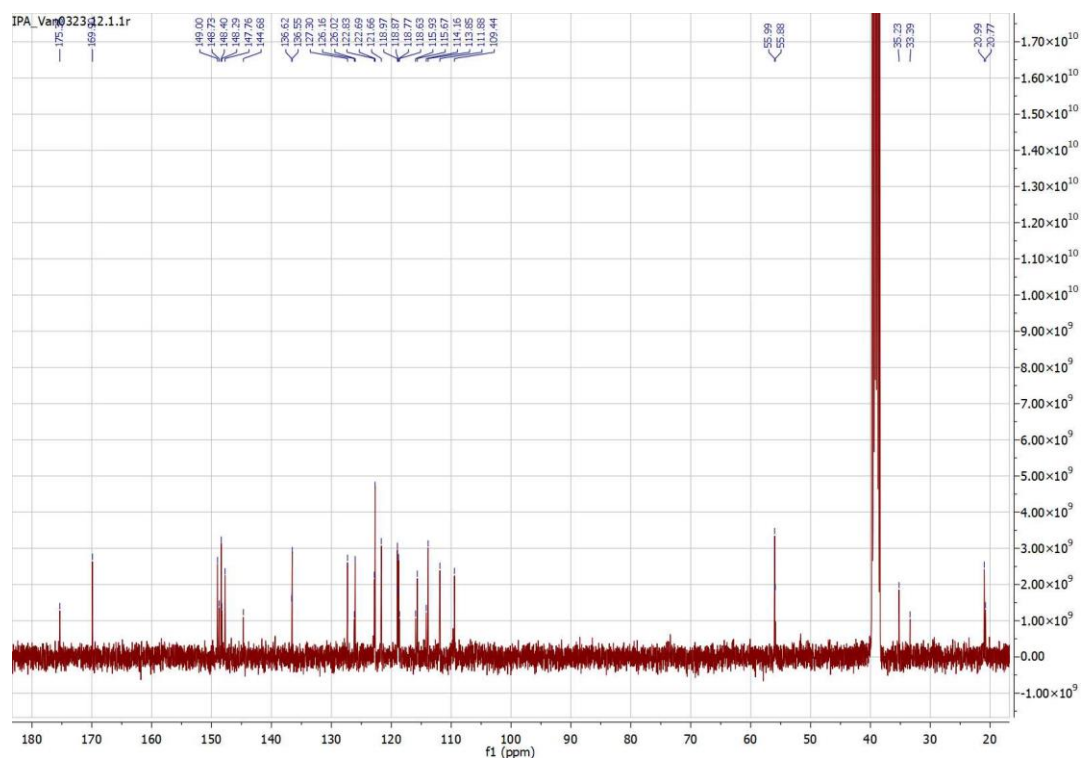

**Figure S7.**  $^{13}\text{C}$  NMR spectrum of **3d** (151 MHz,  $\text{DMSO-d}_6$ ).

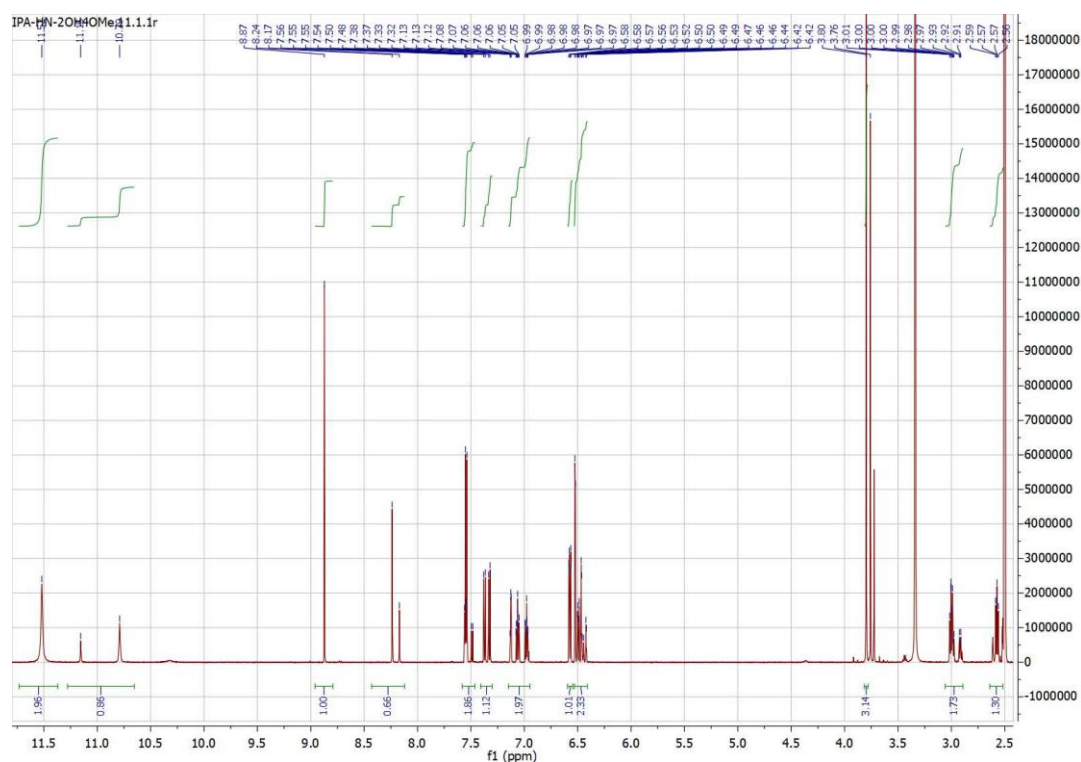

**Figure S8.**  $^1\text{H}$  NMR spectrum of (**3e**) (600 MHz,  $\text{DMSO-d}_6$ ).

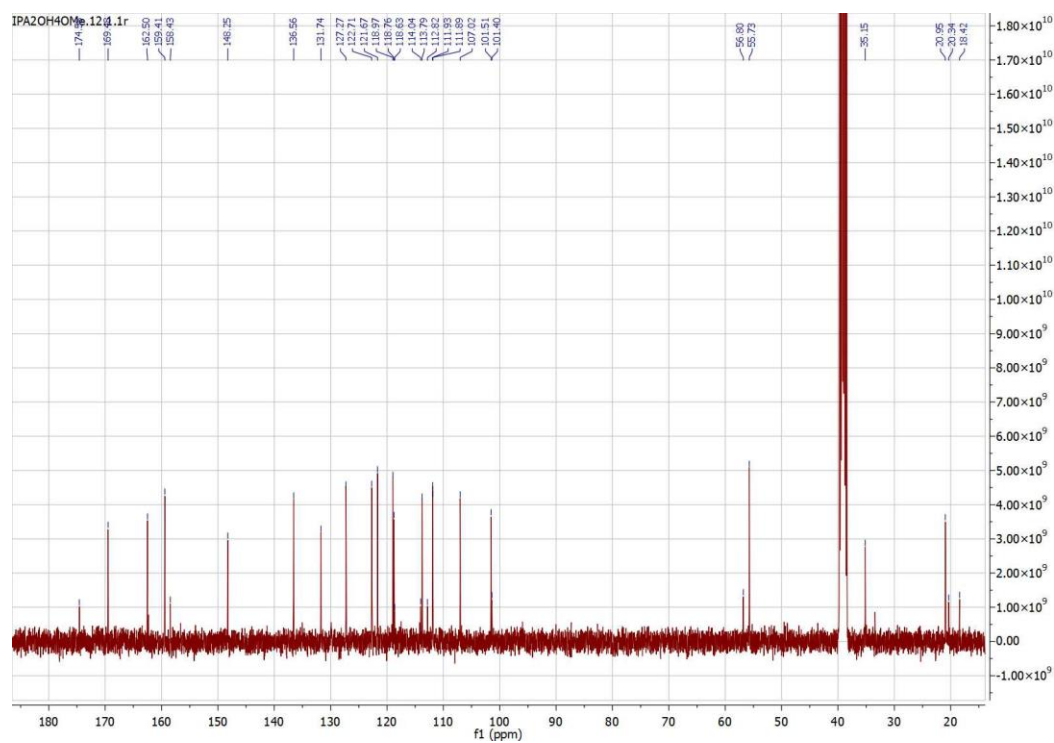

Figure S9.  $^{13}\text{C}$  NMR spectrum of **3e** (151 MHz,  $\text{DMSO-d}_6$ ).

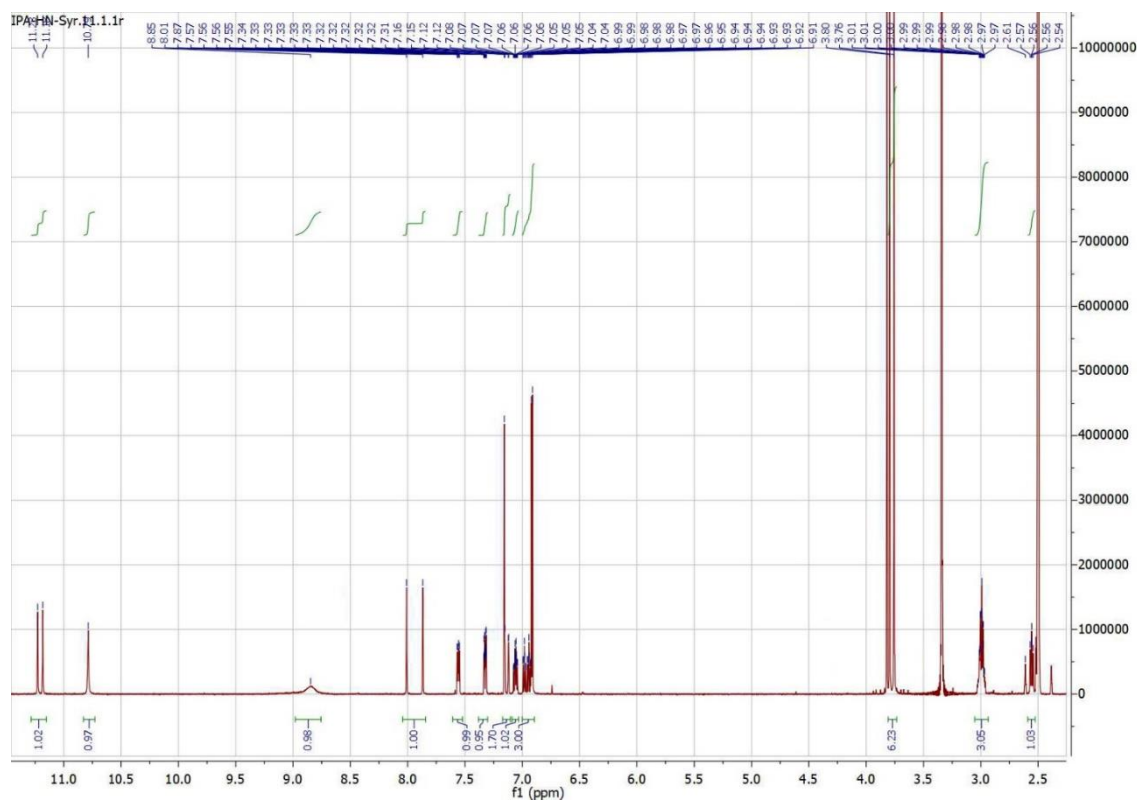

Figure S10.  $^1\text{H}$  NMR spectrum of (**3f**) (600 MHz,  $\text{DMSO-d}_6$ ).

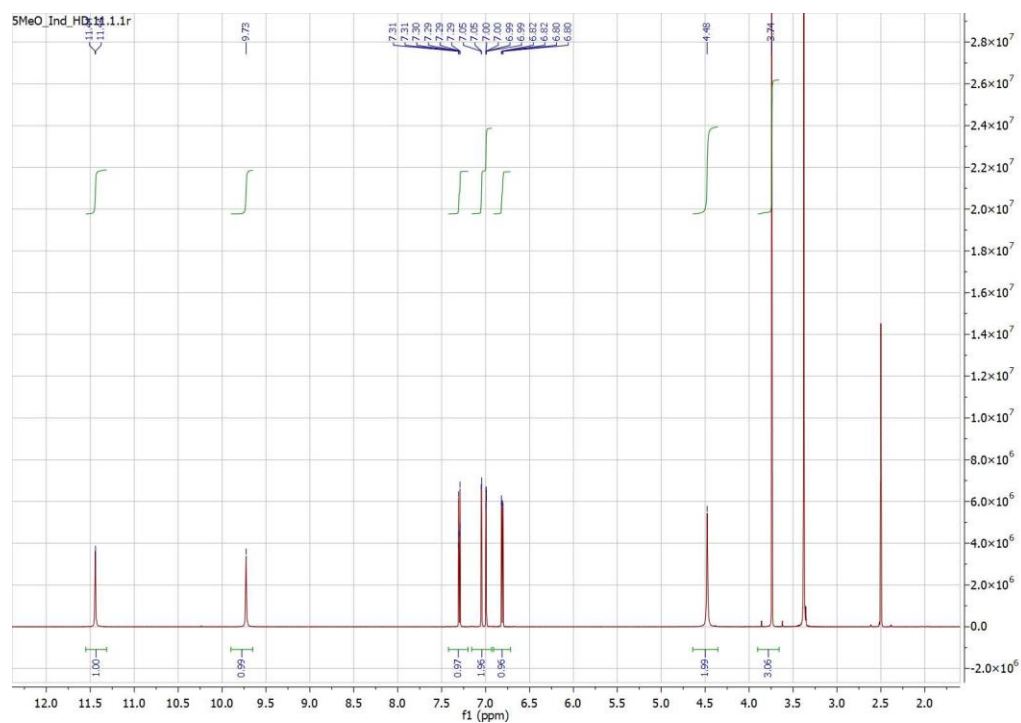

**Figure S11.**  $^1\text{H}$  NMR spectrum of **4** (600 MHz,  $\text{DMSO-d}_6$ )

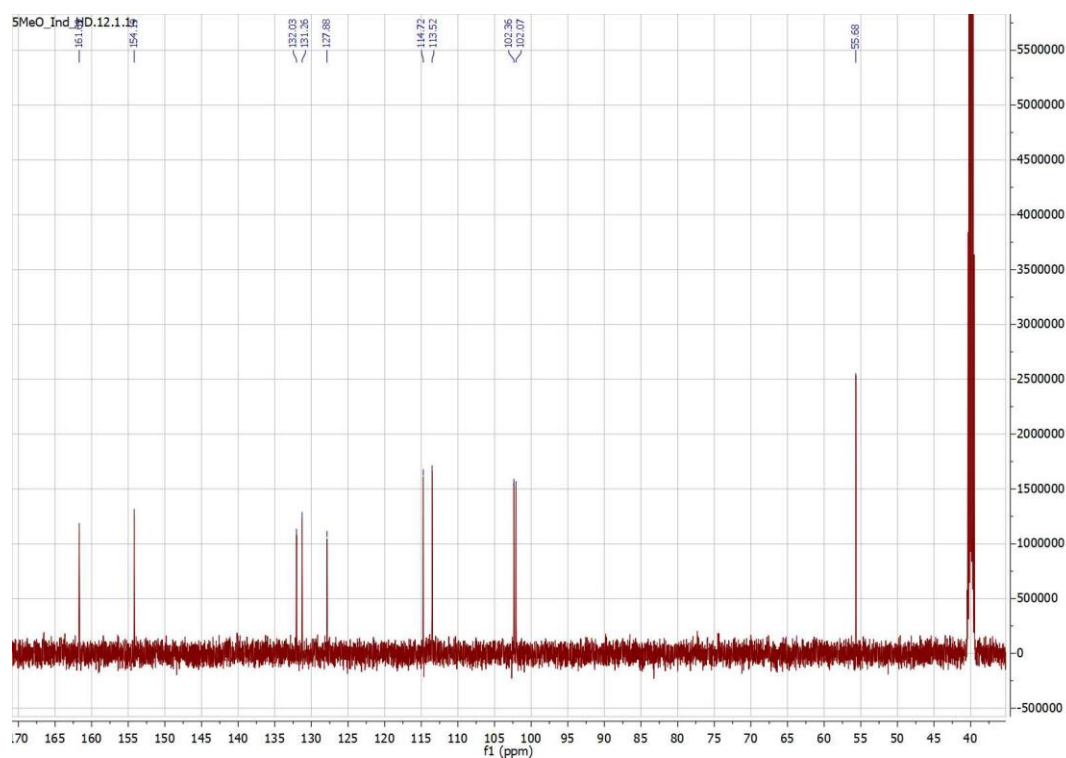

**Figure S12.**  $^{13}\text{C}$  NMR spectrum of **4** (151 MHz,  $\text{DMSO-d}_6$ ).



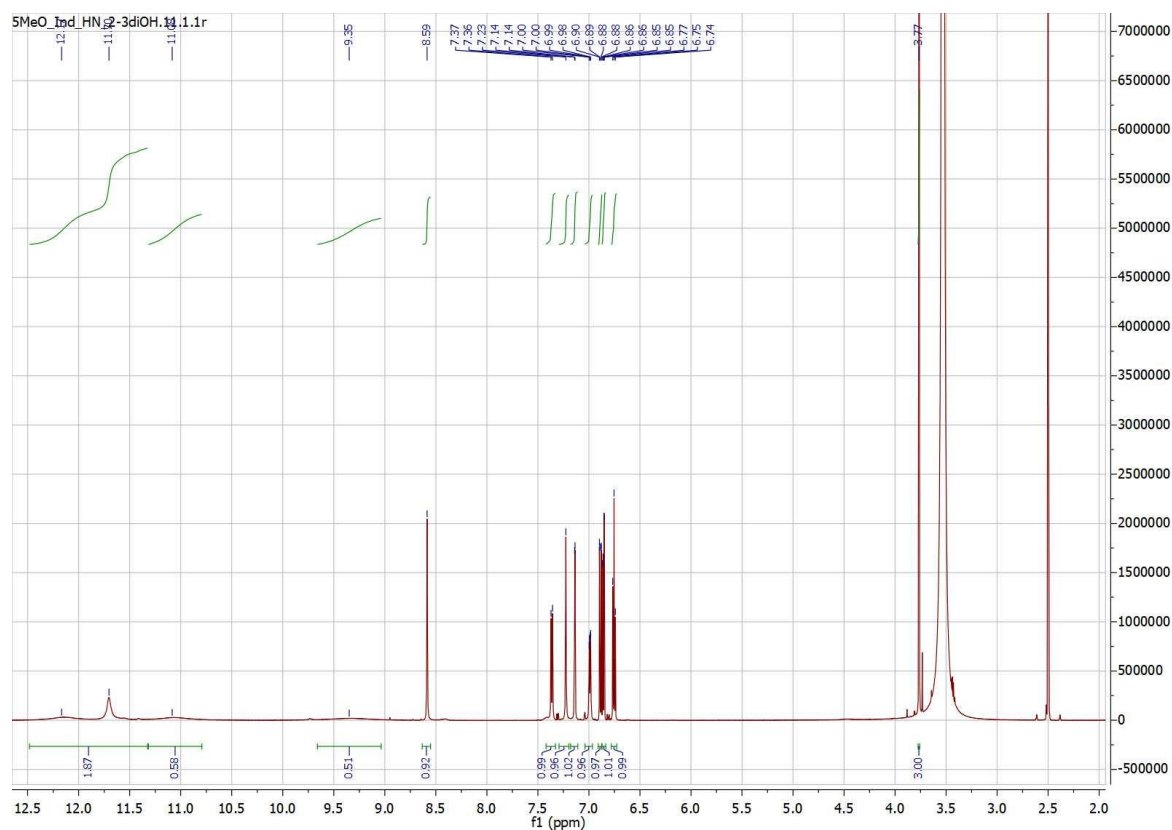

**Figure S13.**  $^1\text{H}$  NMR spectrum of (5a) (600 MHz, DMSO- $\text{d}_6$ )

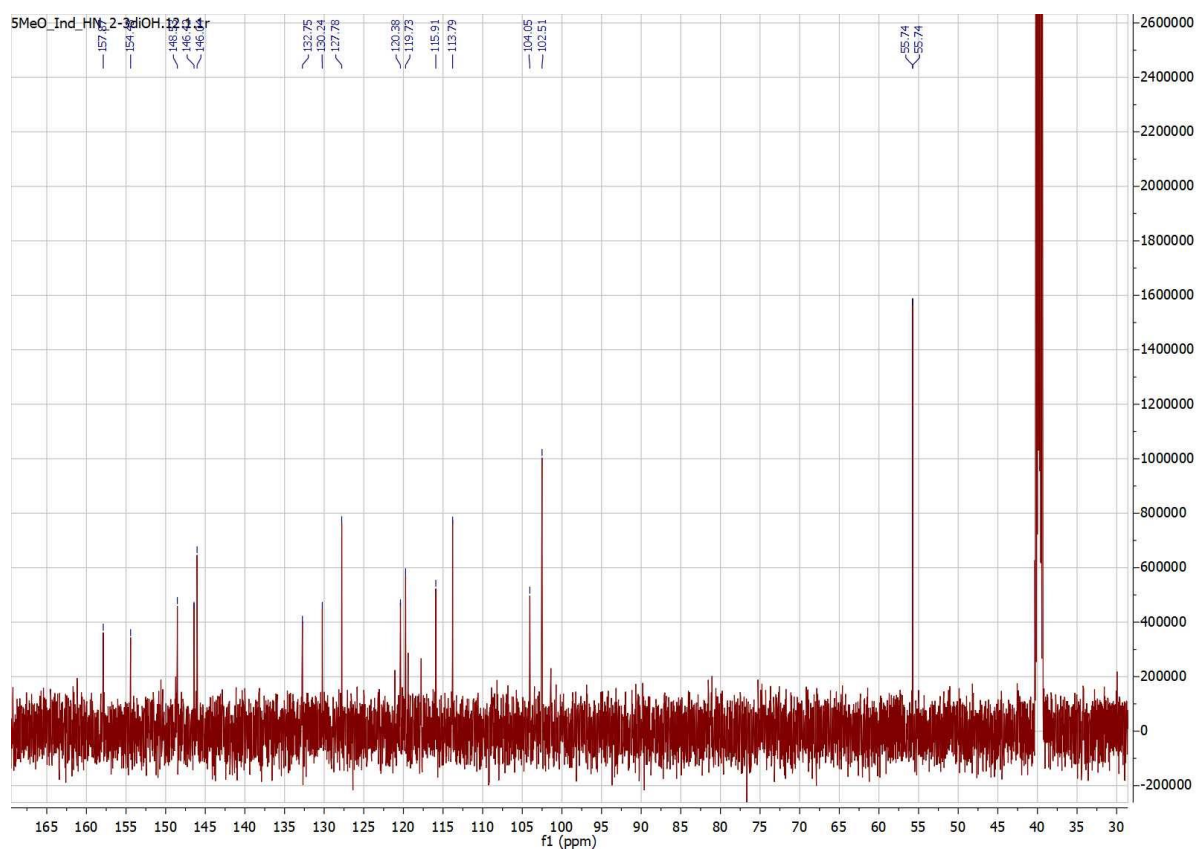

**Figure S14.**  $^{13}\text{C}$  NMR spectrum of 5a (151 MHz, DMSO- $\text{d}_6$ ).



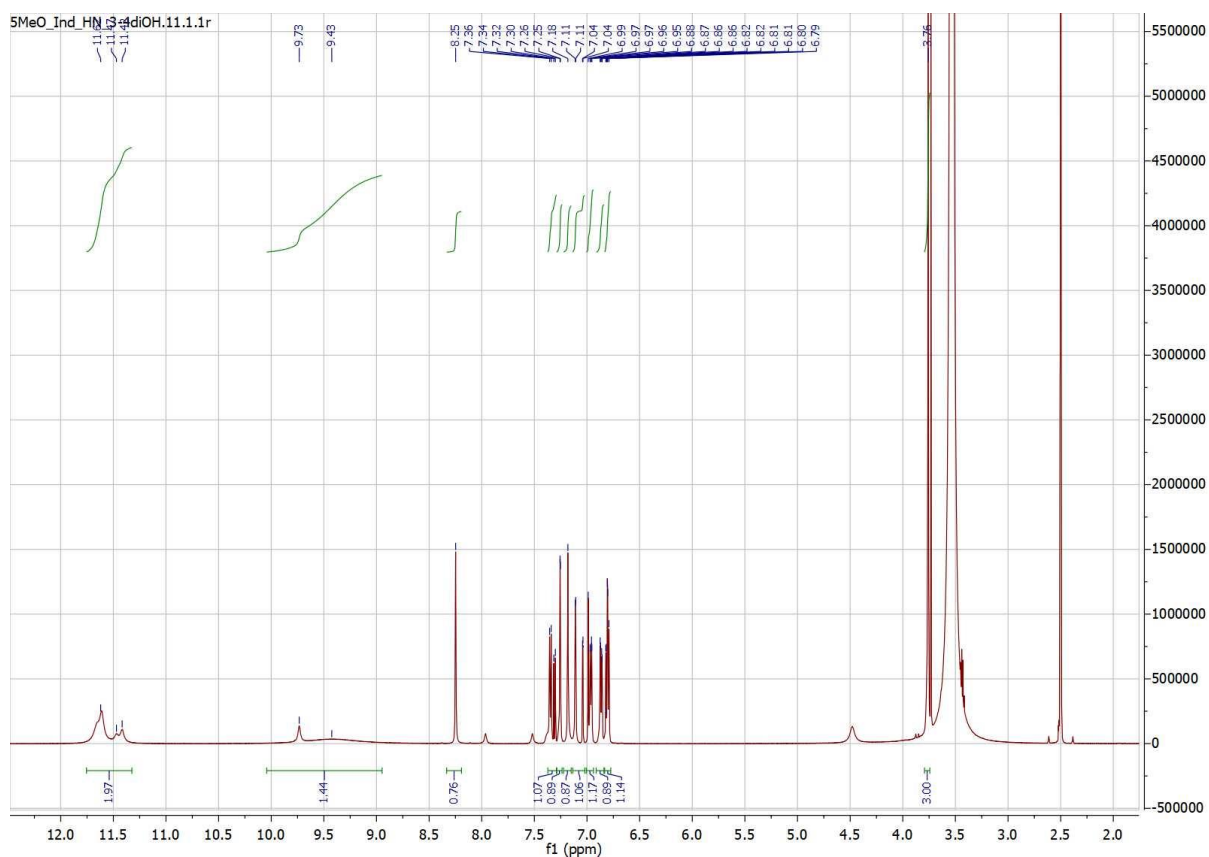

Figure S15.  $^1\text{H}$  NMR spectrum of **5b** (600 MHz,  $\text{DMSO-d}_6$ ).

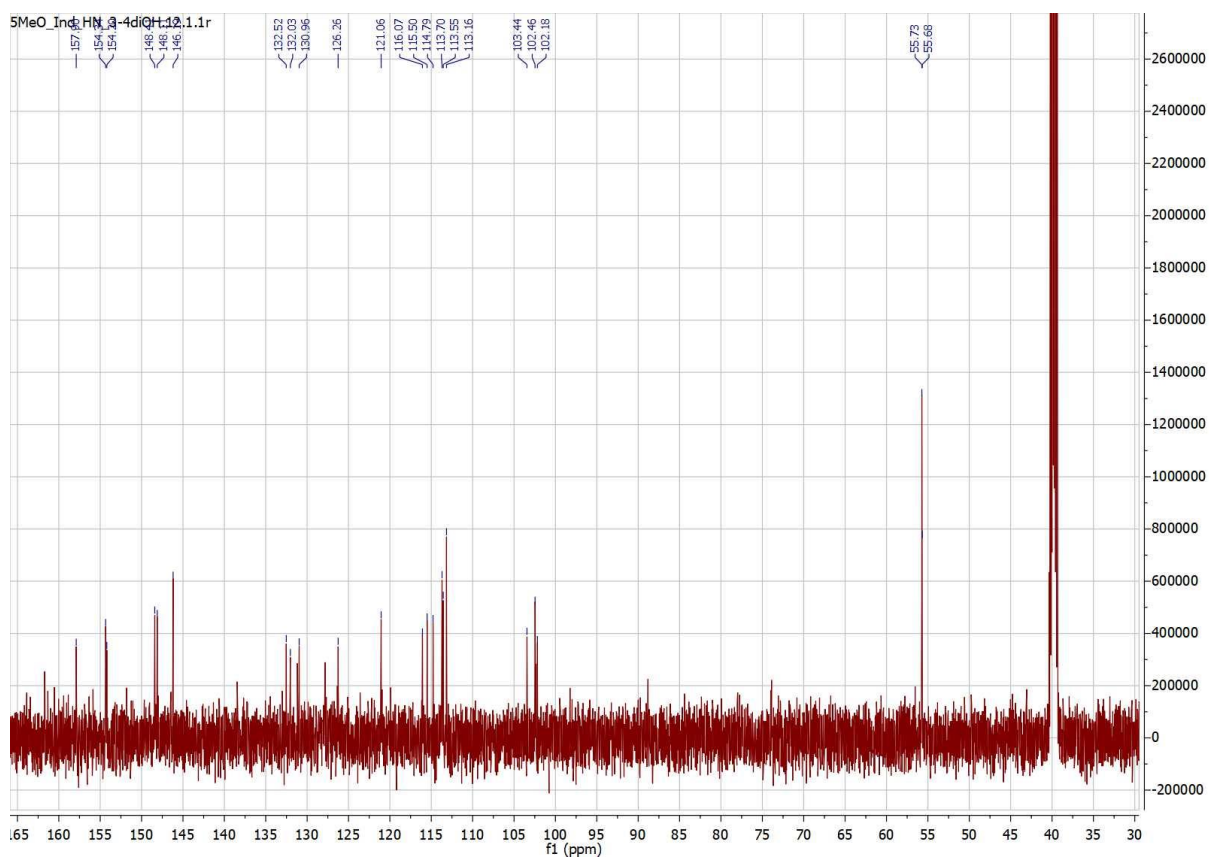

Figure S16.  $^{13}\text{C}$  NMR spectrum of **5b** (151 MHz,  $\text{DMSO-d}_6$ ).

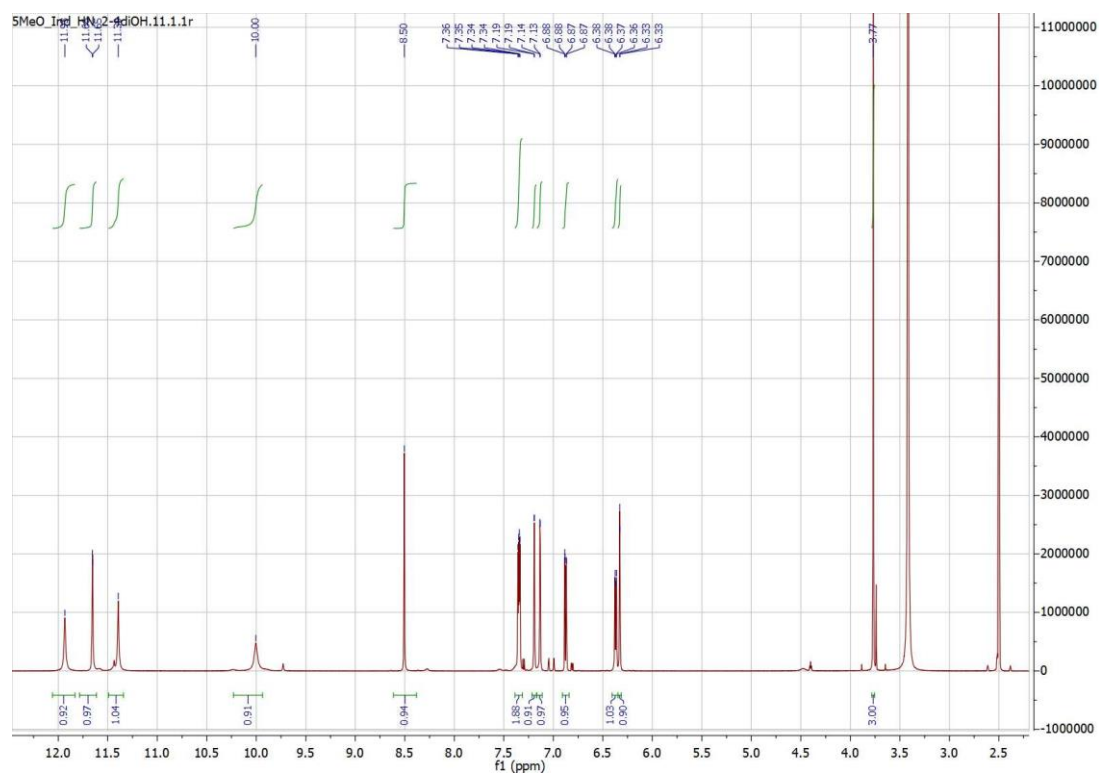

Figure S17.  $^1\text{H}$  NMR spectrum of **5c** (600 MHz,  $\text{DMSO-d}_6$ )

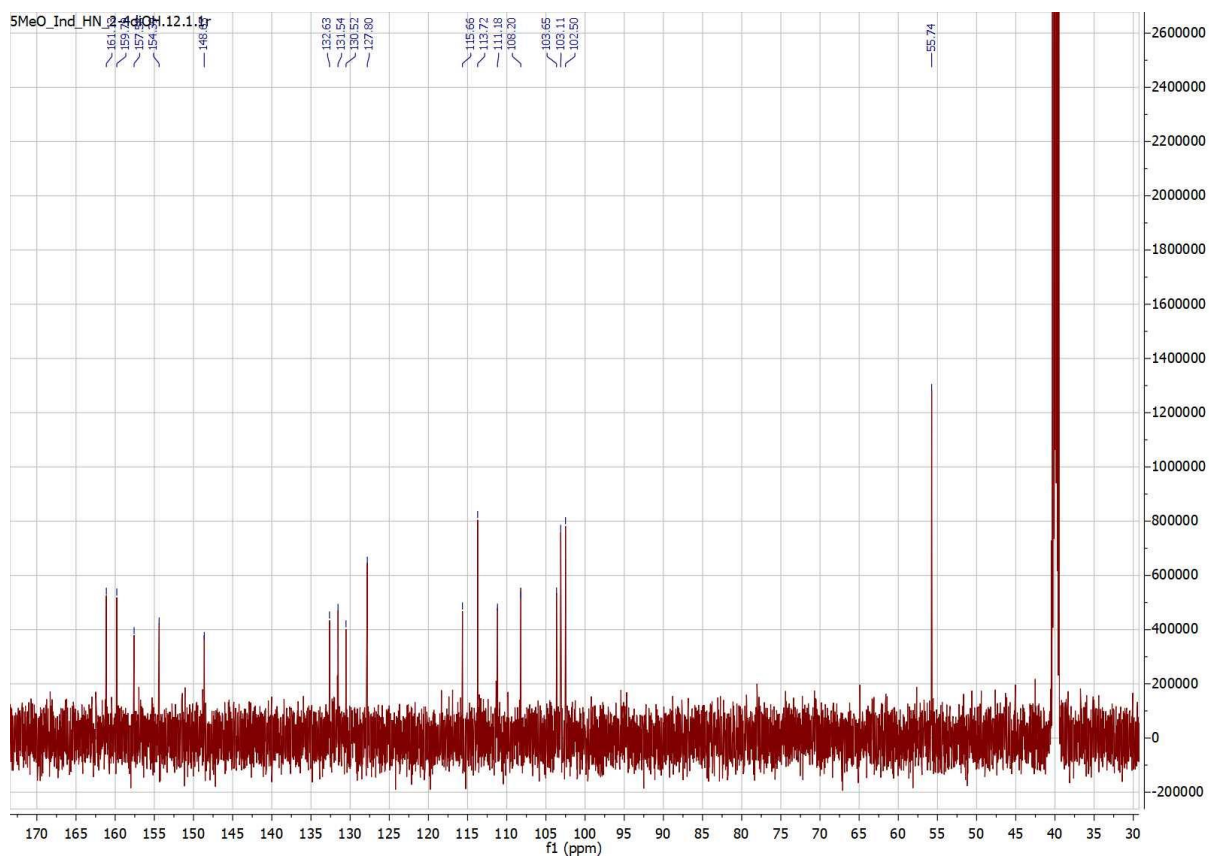

Figure S18.  $^{13}\text{C}$  NMR spectrum of **5c** (151 MHz,  $\text{DMSO-d}_6$ ).

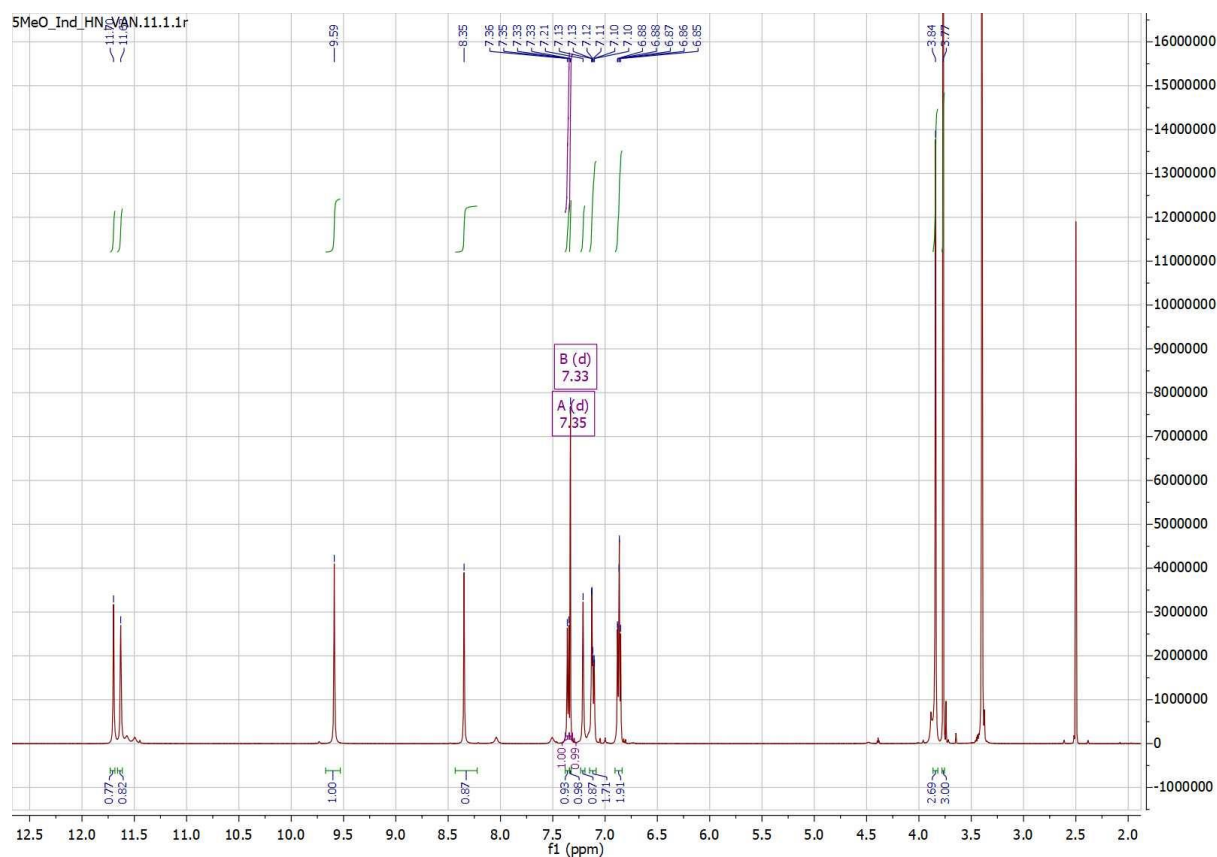

Figure S19.  $^1\text{H}$  NMR spectrum of **5d** (600 MHz,  $\text{DMSO-d}_6$ )

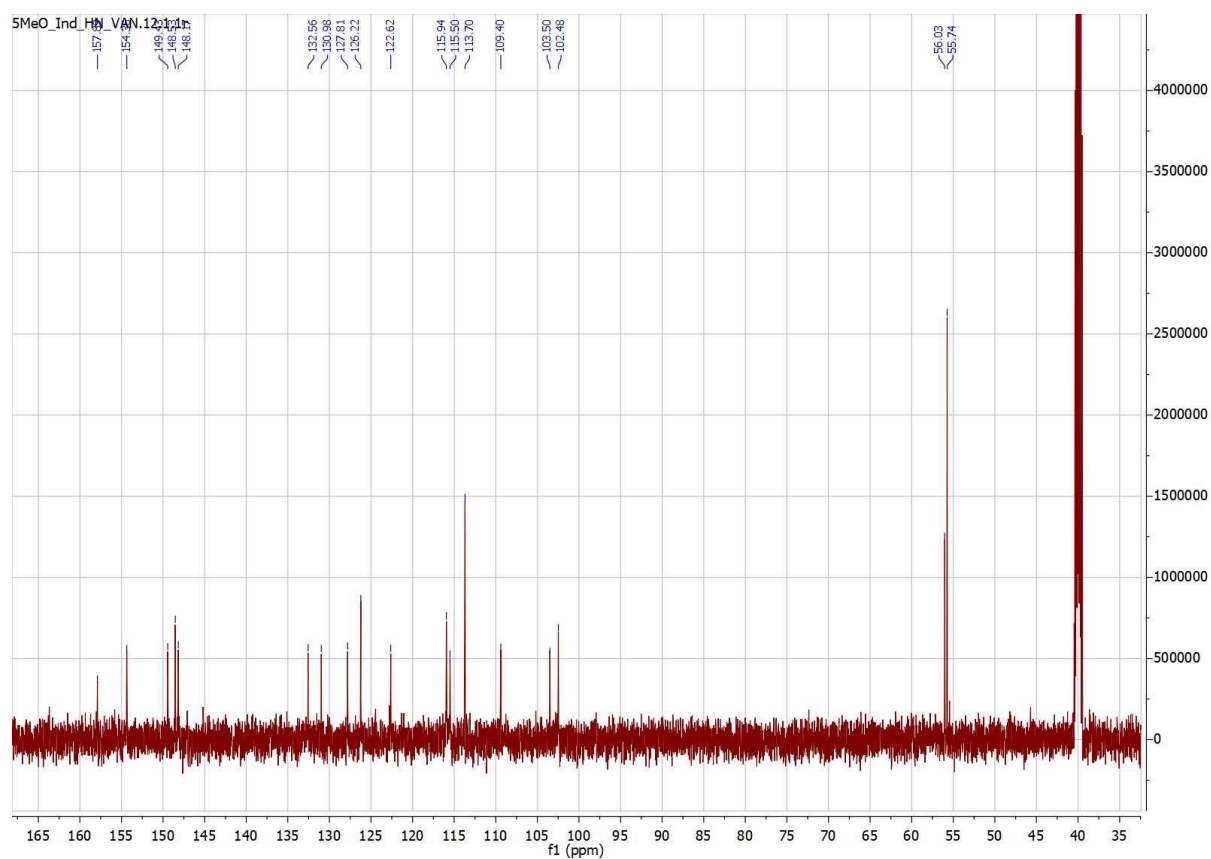

Figure S20.  $^{13}\text{C}$  NMR spectrum of **5d** (151 MHz,  $\text{DMSO-d}_6$ )

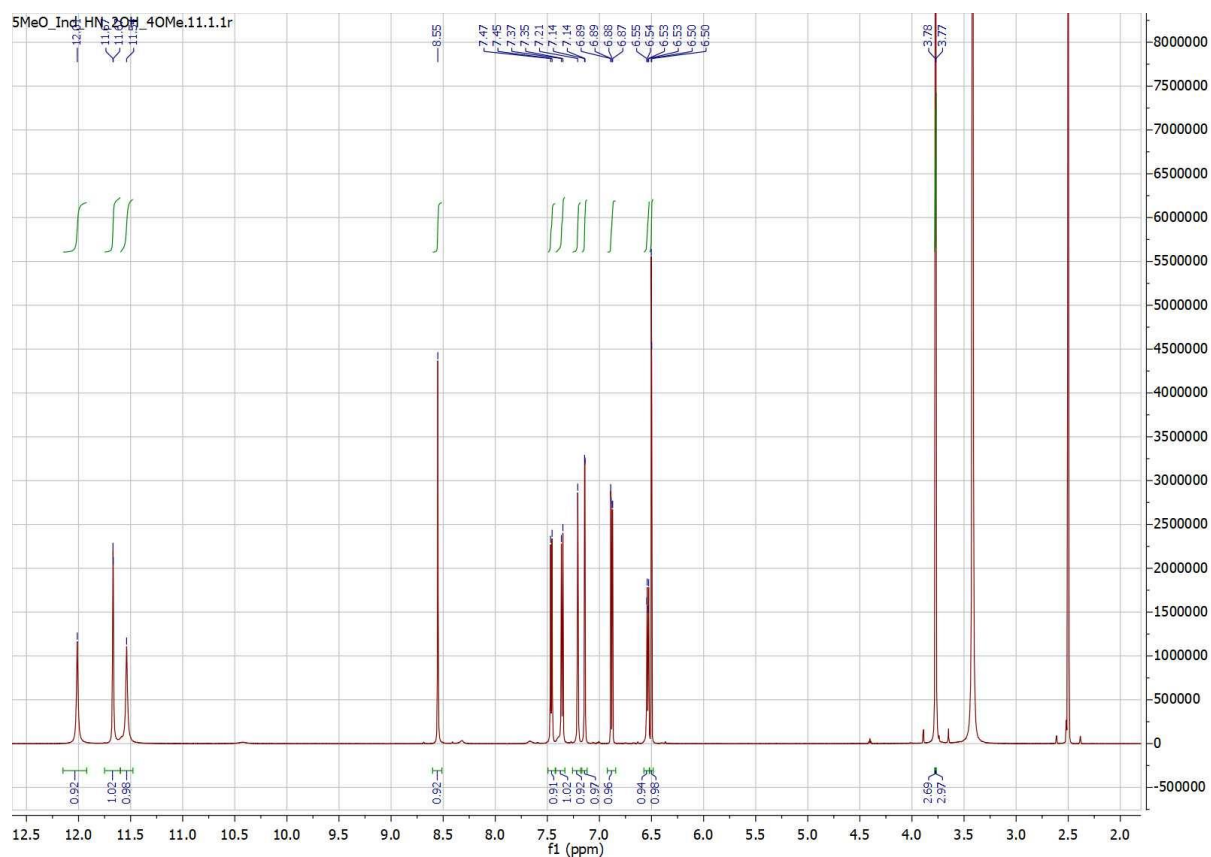

Figure S21.  $^1\text{H}$  NMR spectrum of **5e** (600 MHz,  $\text{DMSO-d}_6$ )

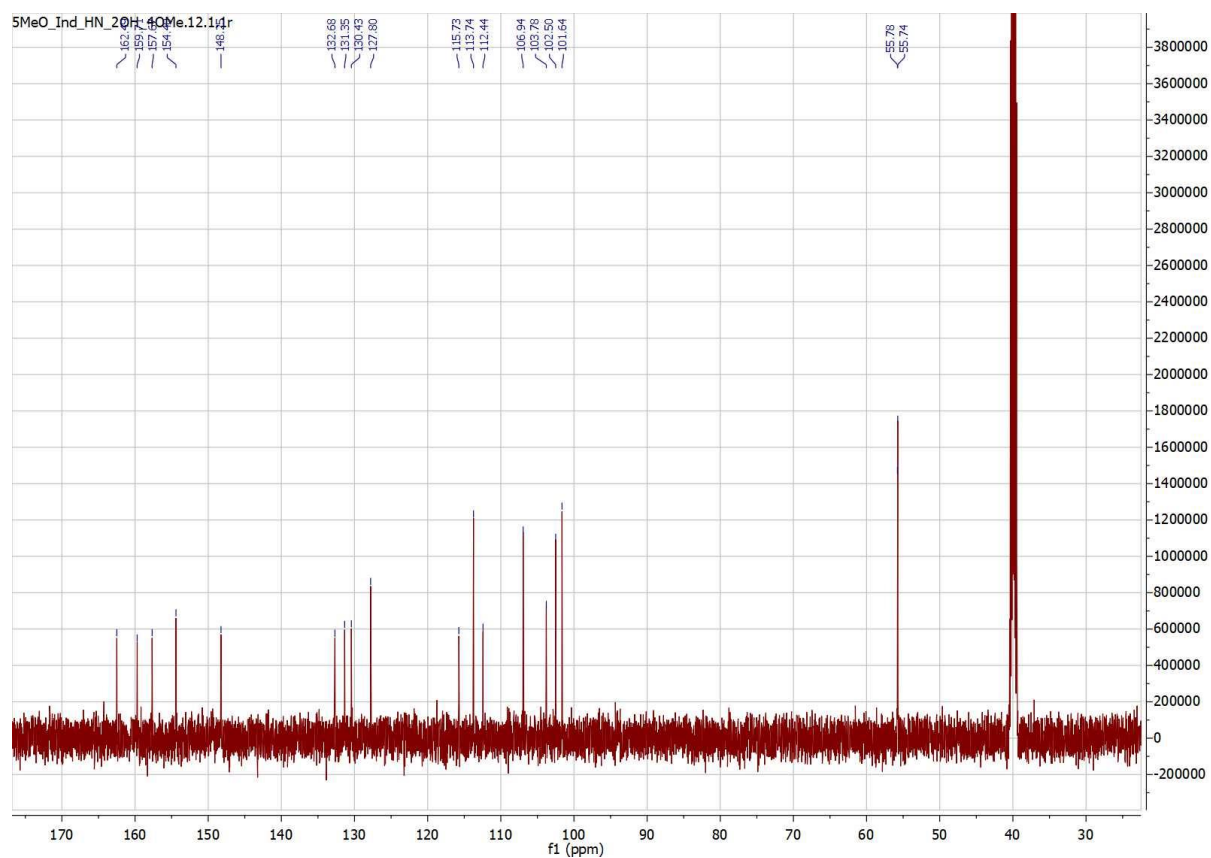

Figure S22.  $^{13}\text{C}$  NMR spectrum of **5e** (151 MHz,  $\text{DMSO-d}_6$ )

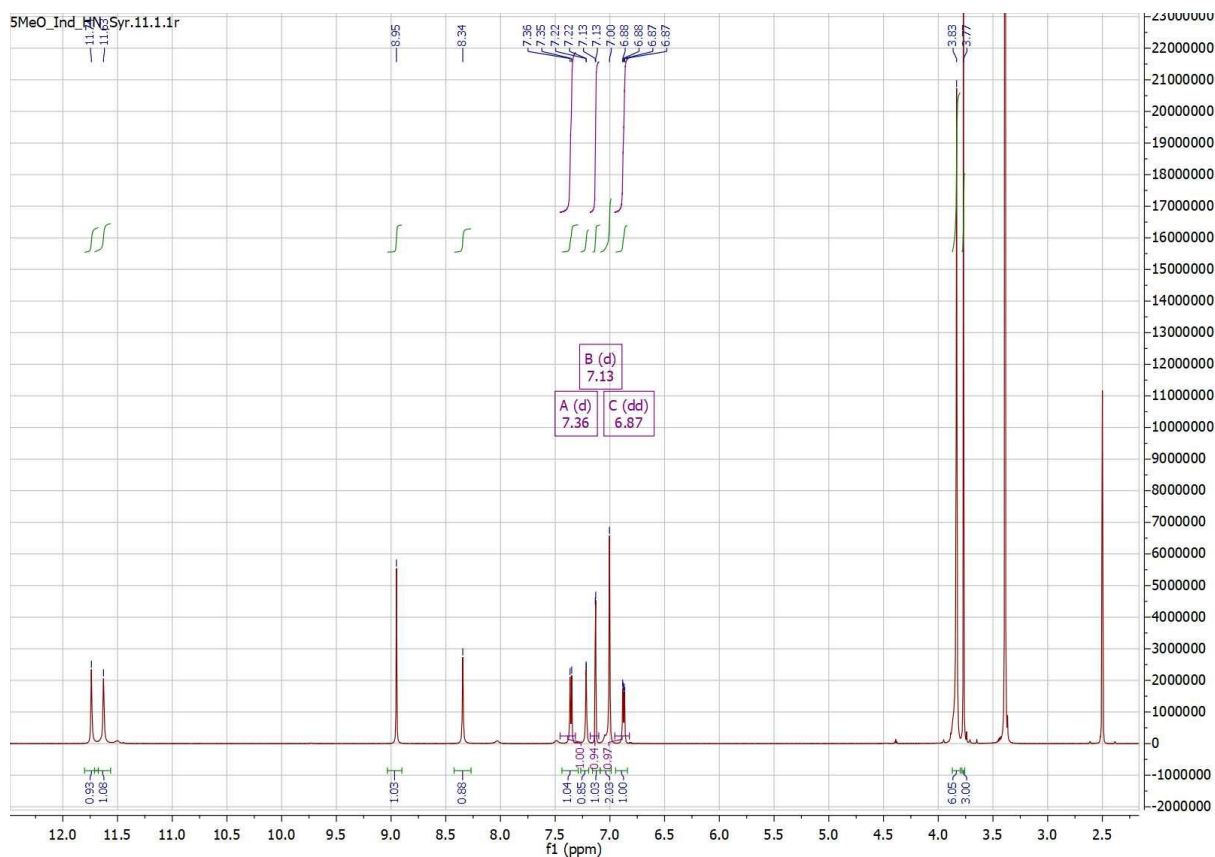

Figure S23.  $^1\text{H}$  NMR spectrum of **5f** (600 MHz, DMSO- $\text{d}_6$ )

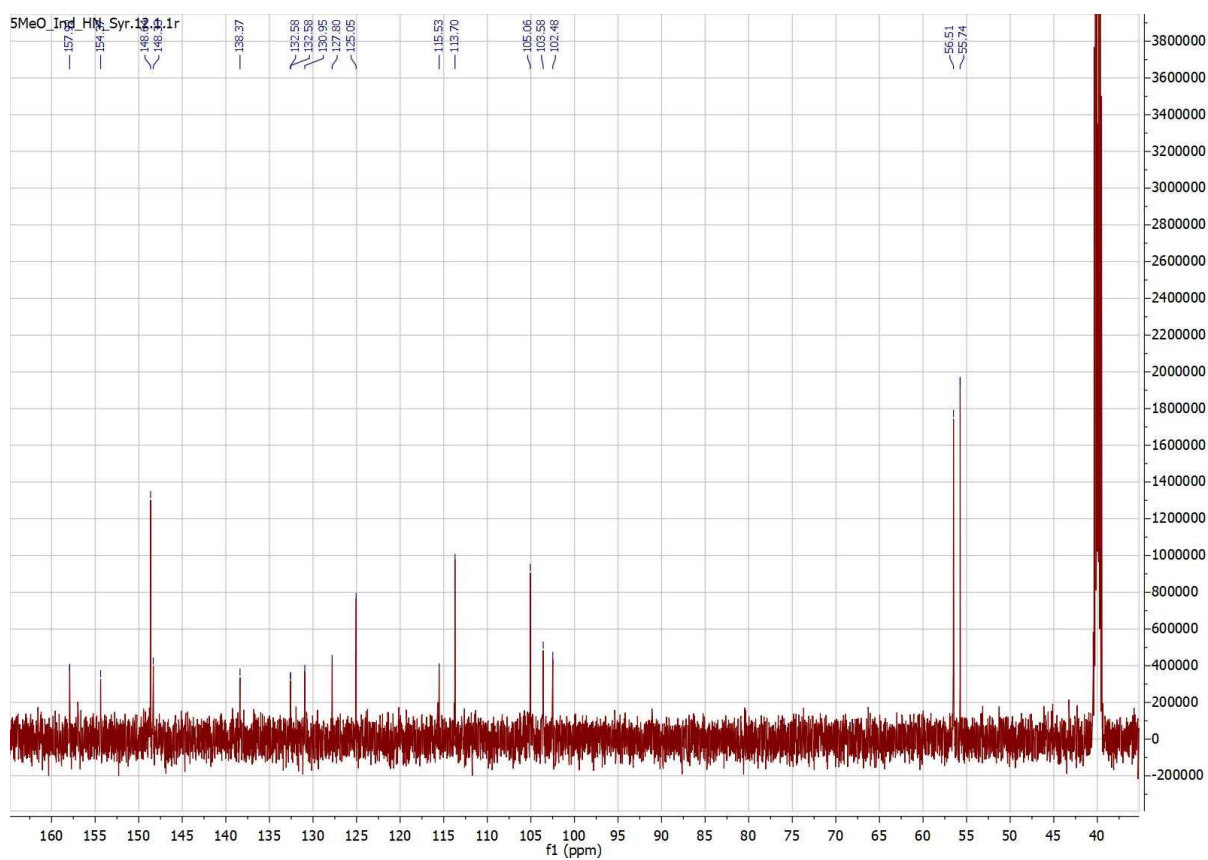

Figure S24.  $^{13}\text{C}$  NMR spectrum of **5f** (151 MHz, DMSO- $\text{d}_6$ )

### 3. IR spectra of the synthesized compounds

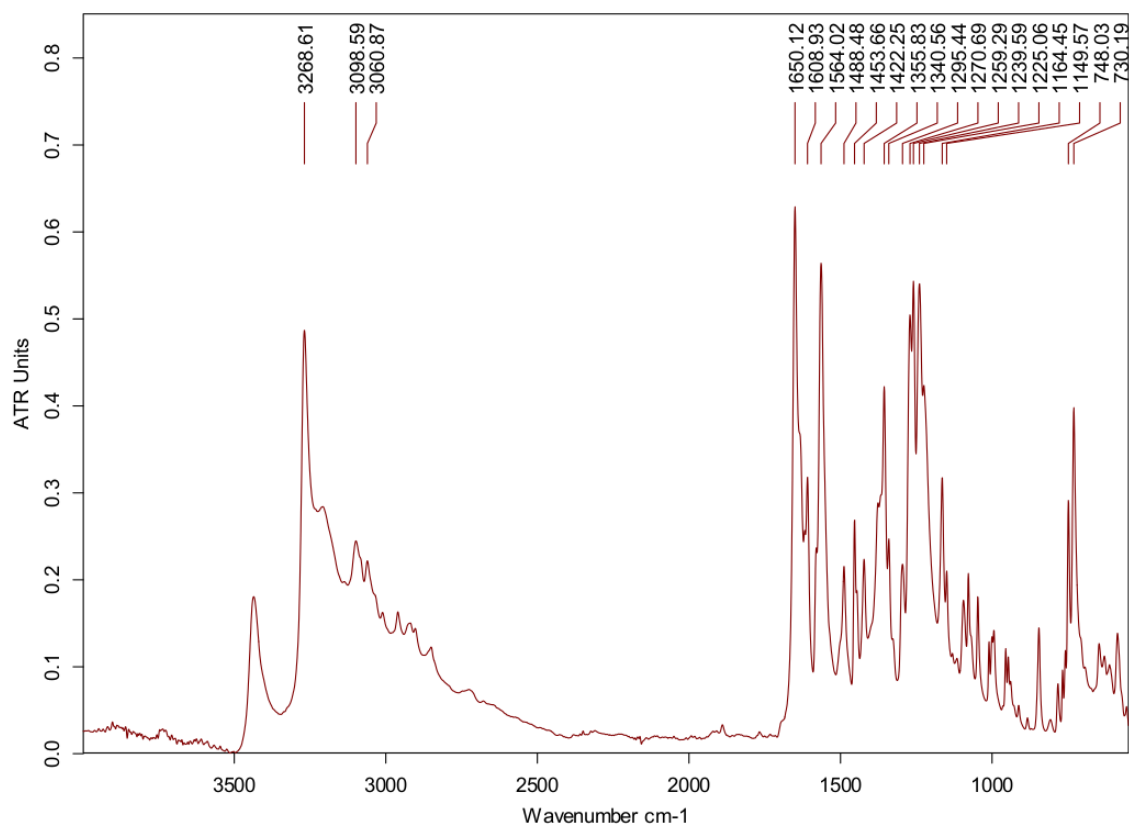

Figure S25. ATR-IR spectrum of 3a

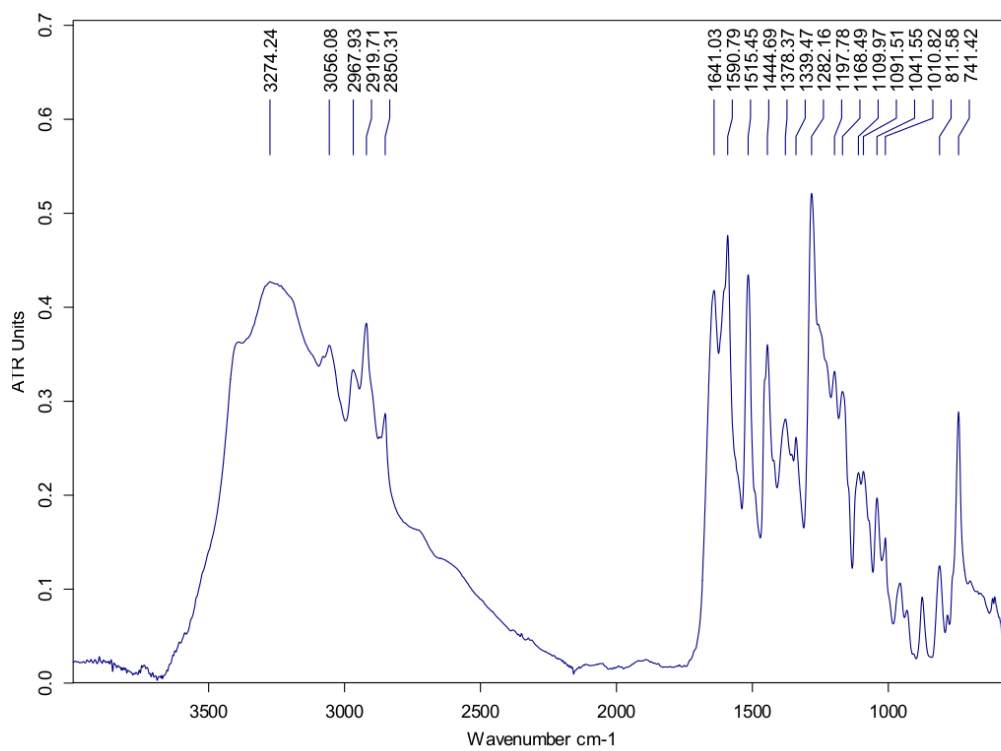

Figure S26. ATR-IR spectrum of 3b



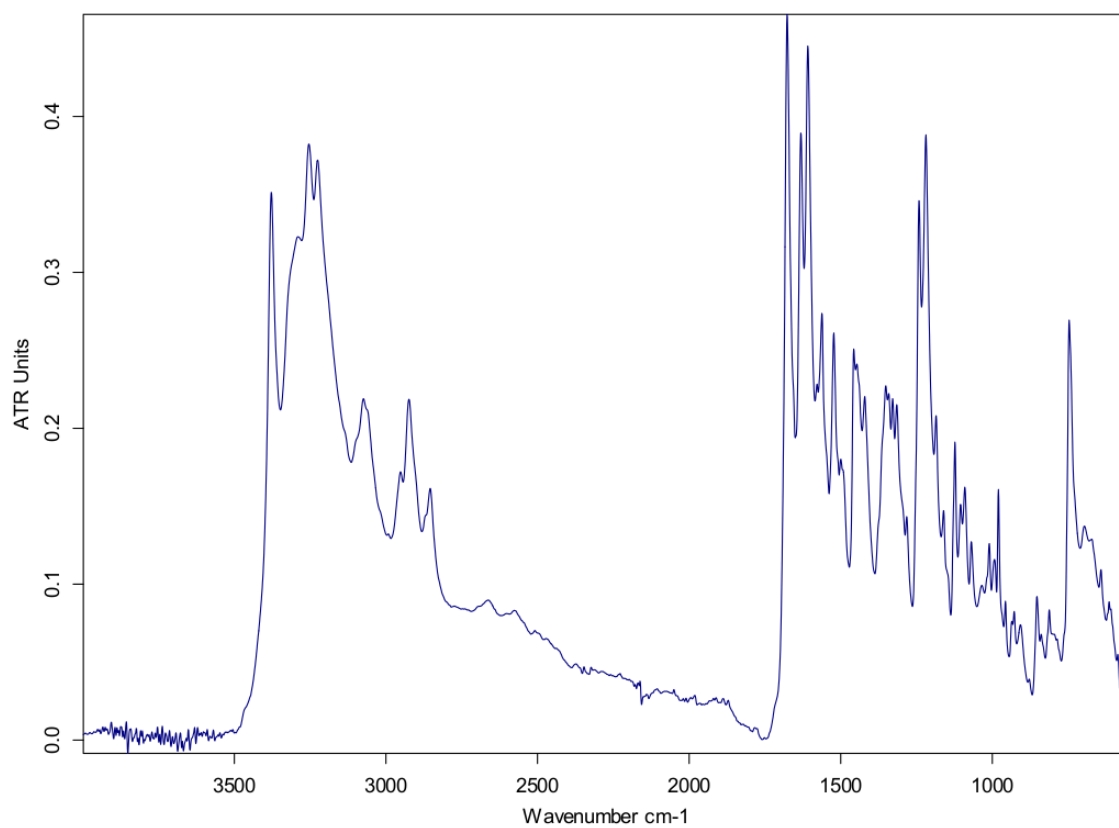

**Figure S27.** ATR-IR spectrum of **3c**

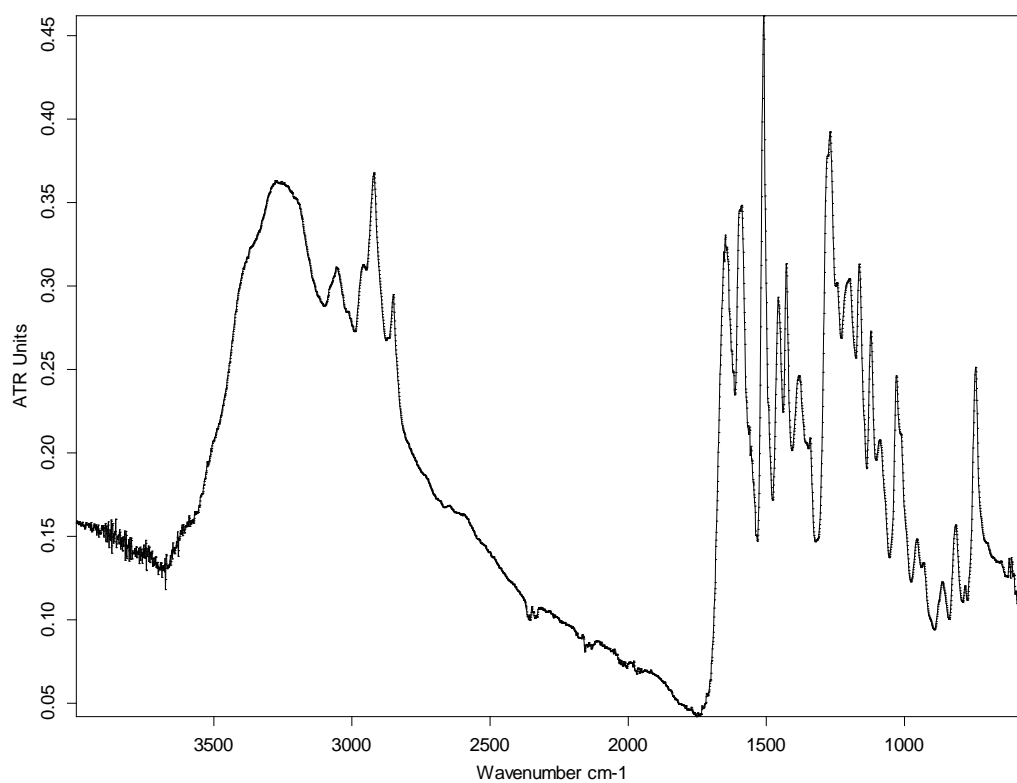

**Figure S28.** ATR-IR spectrum of **3d**

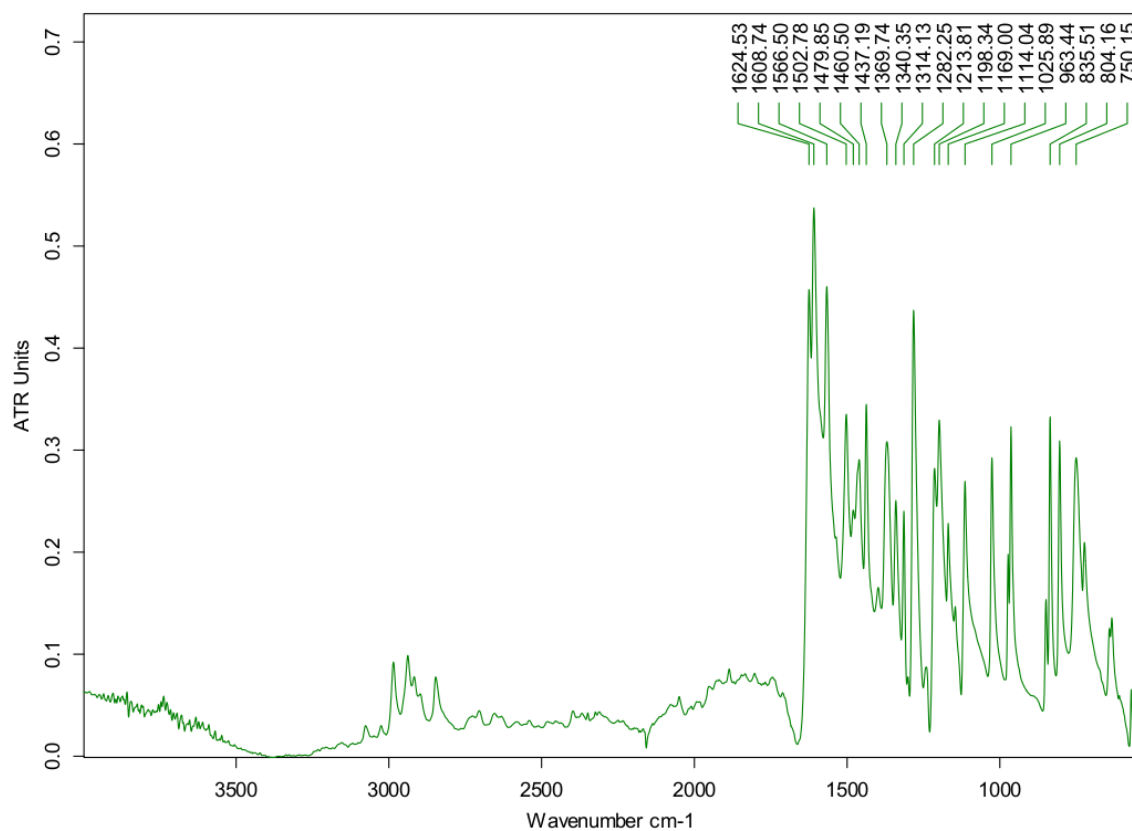

**Figure S29.** ATR-IR spectrum of **3e**

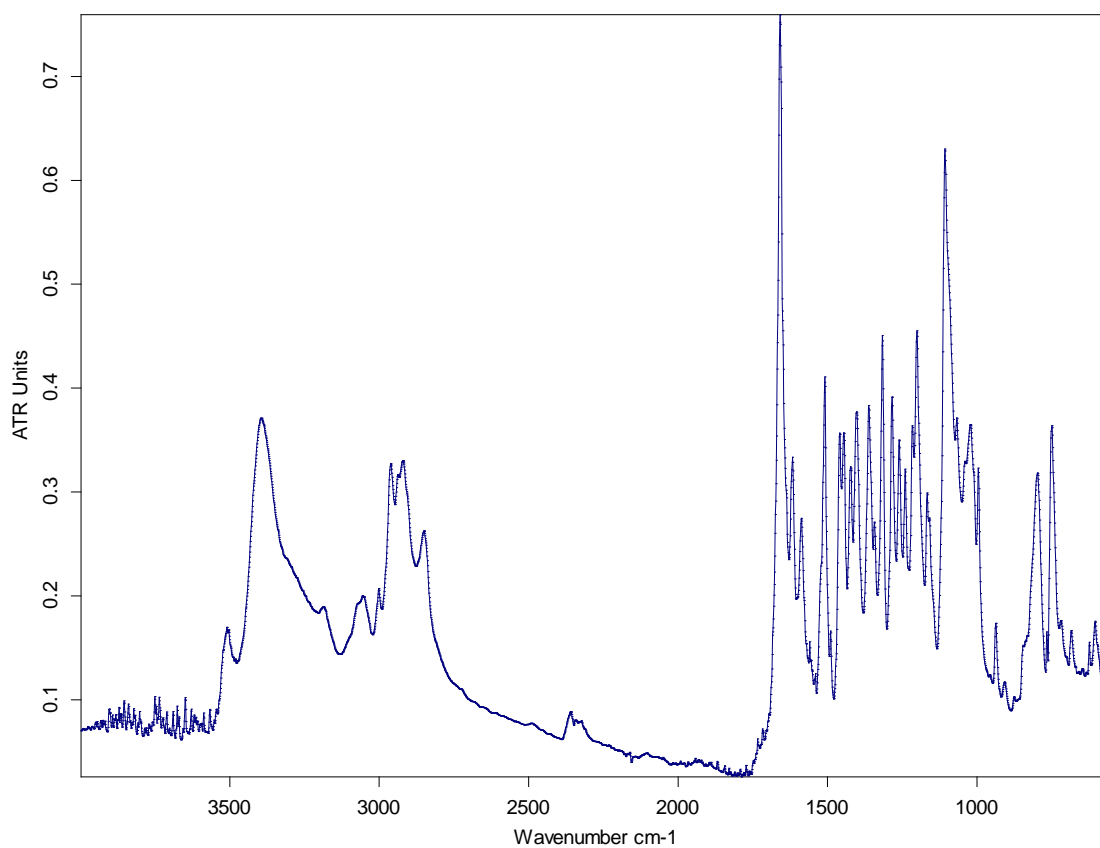

**Figure S30.** ATR-IR spectrum of **3f**

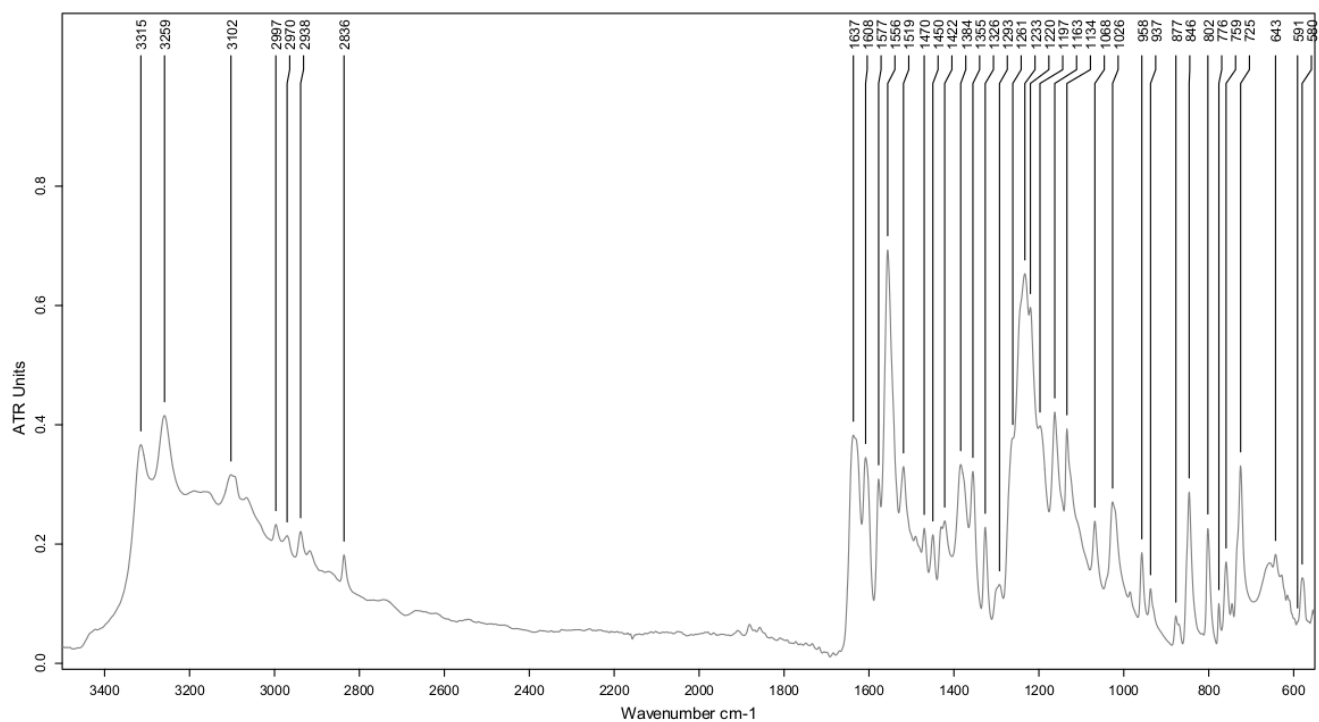

**Figure S31.** ATR-IR spectrum of **5a**

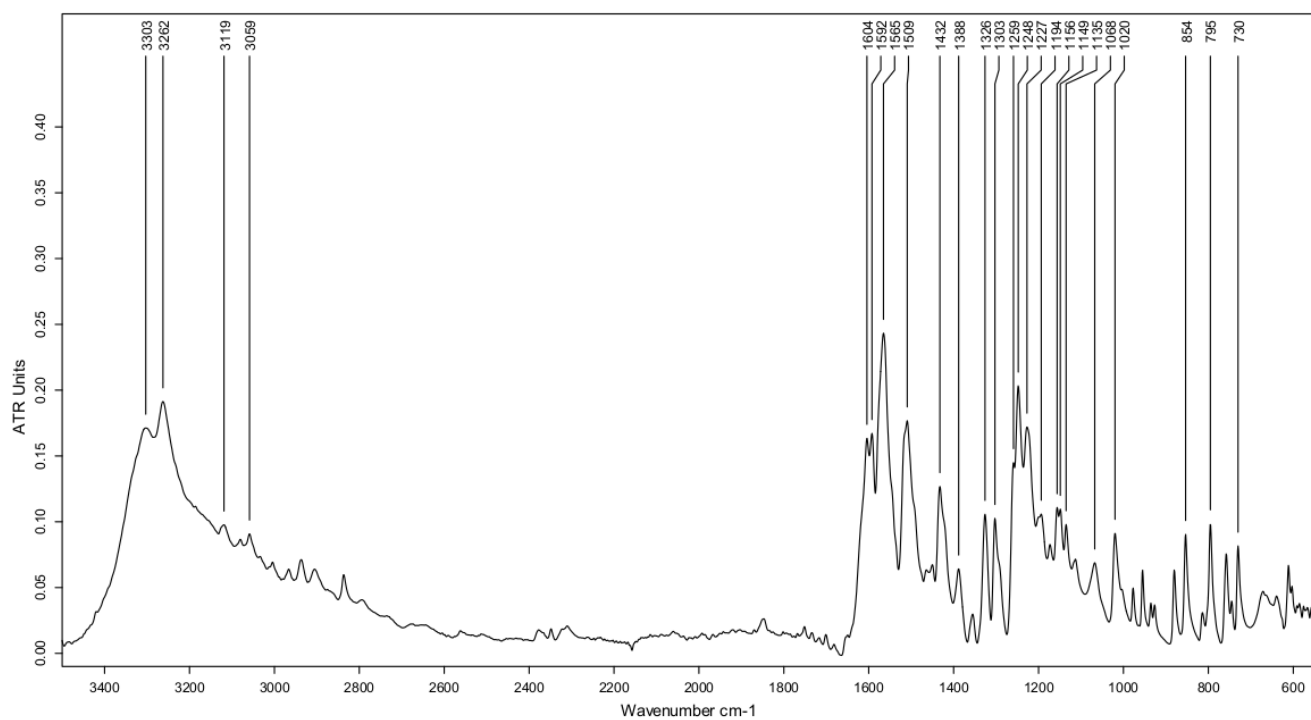

**Figure S32.** ATR-IR spectrum of **5b**

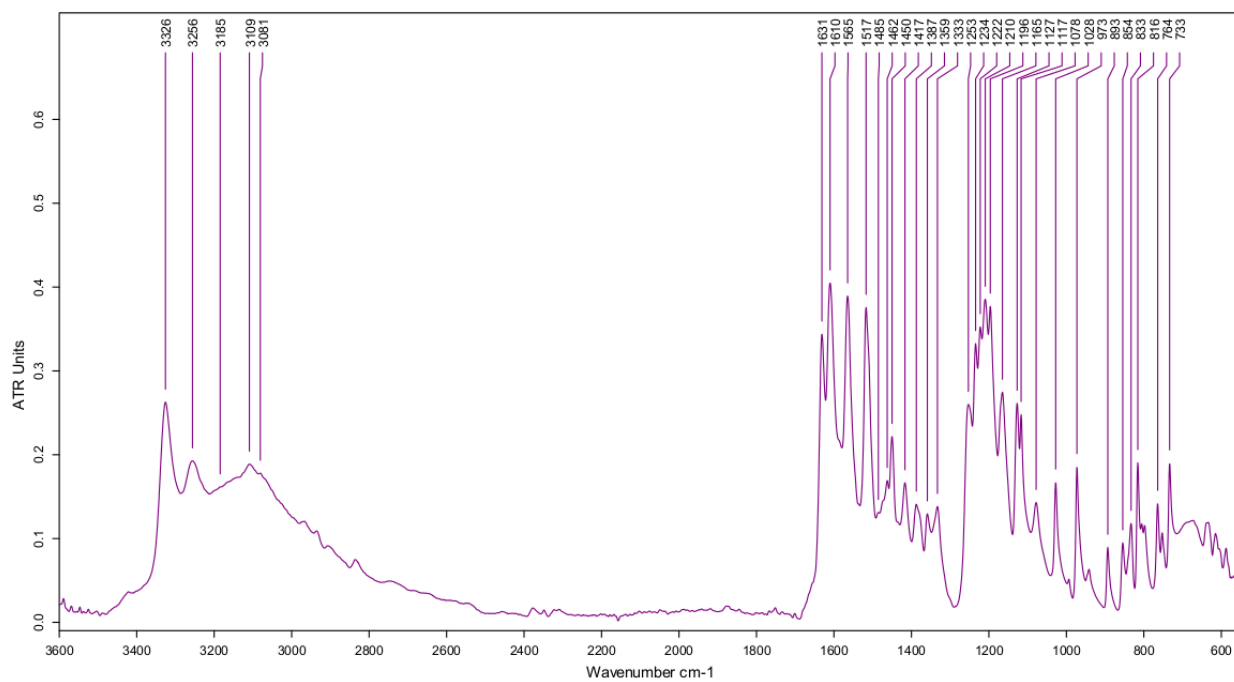

**Figure S33.** ATR-IR spectrum of **5c**

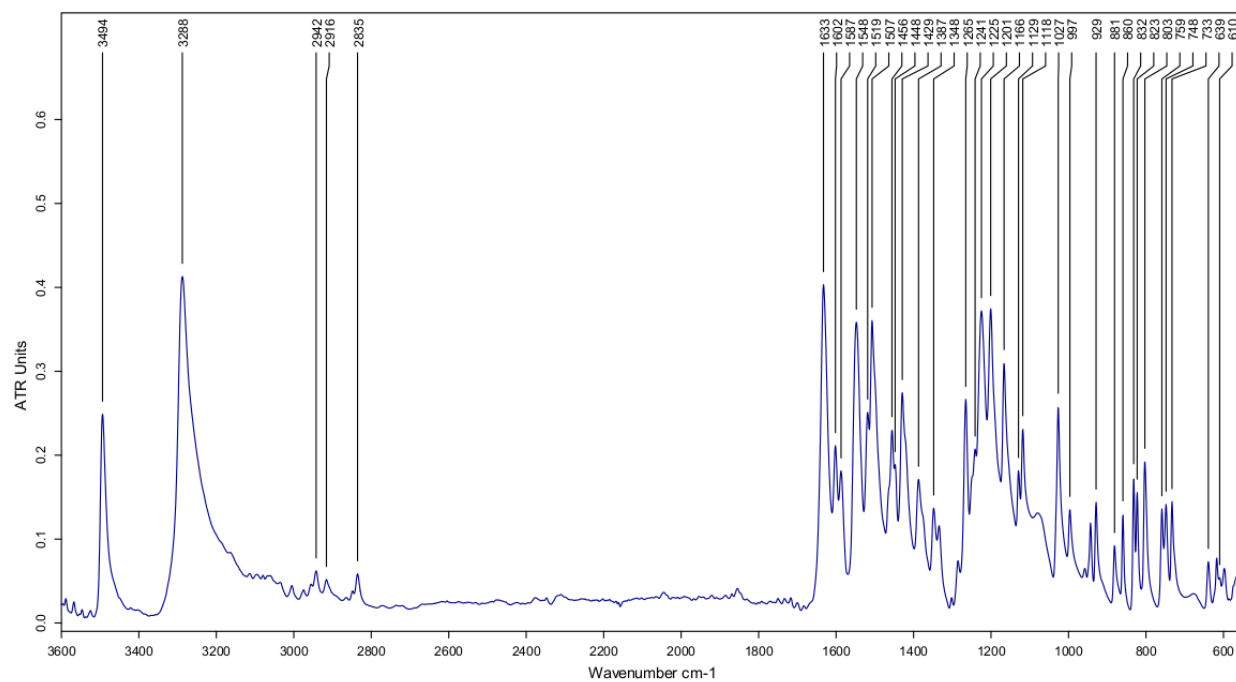

**Figure S34.** ATR-IR spectrum of **5d**

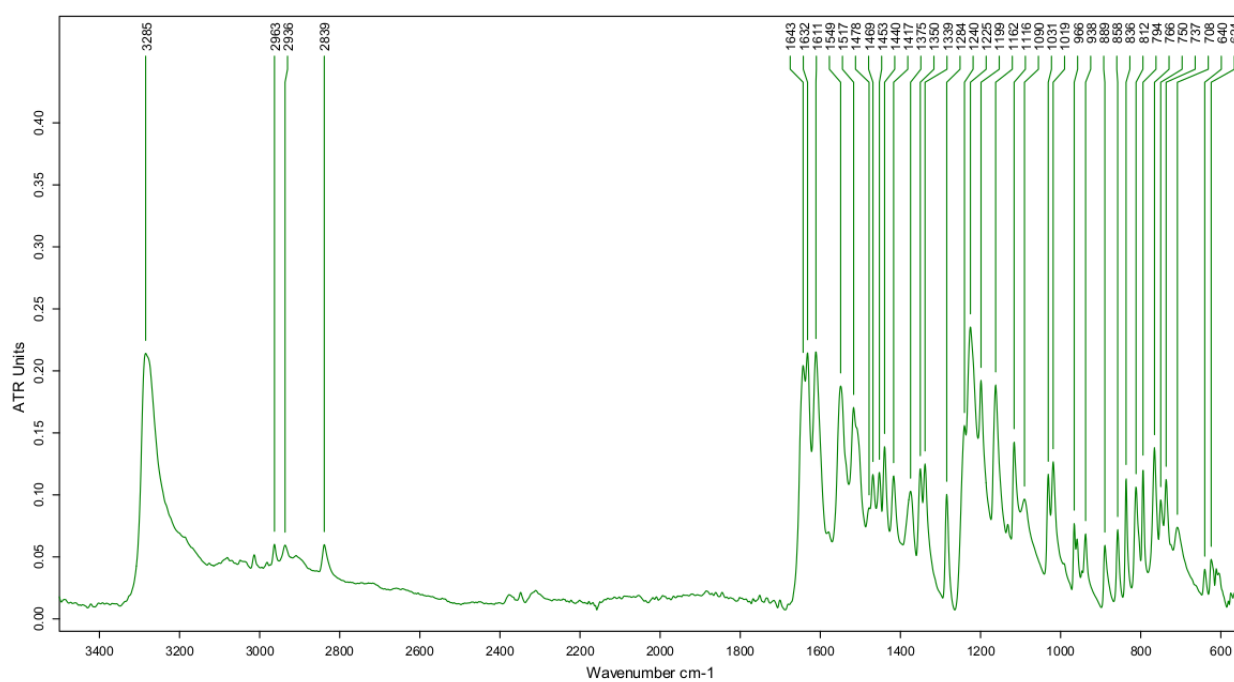

**Figure S35.** ATR-IR spectrum of **5e**

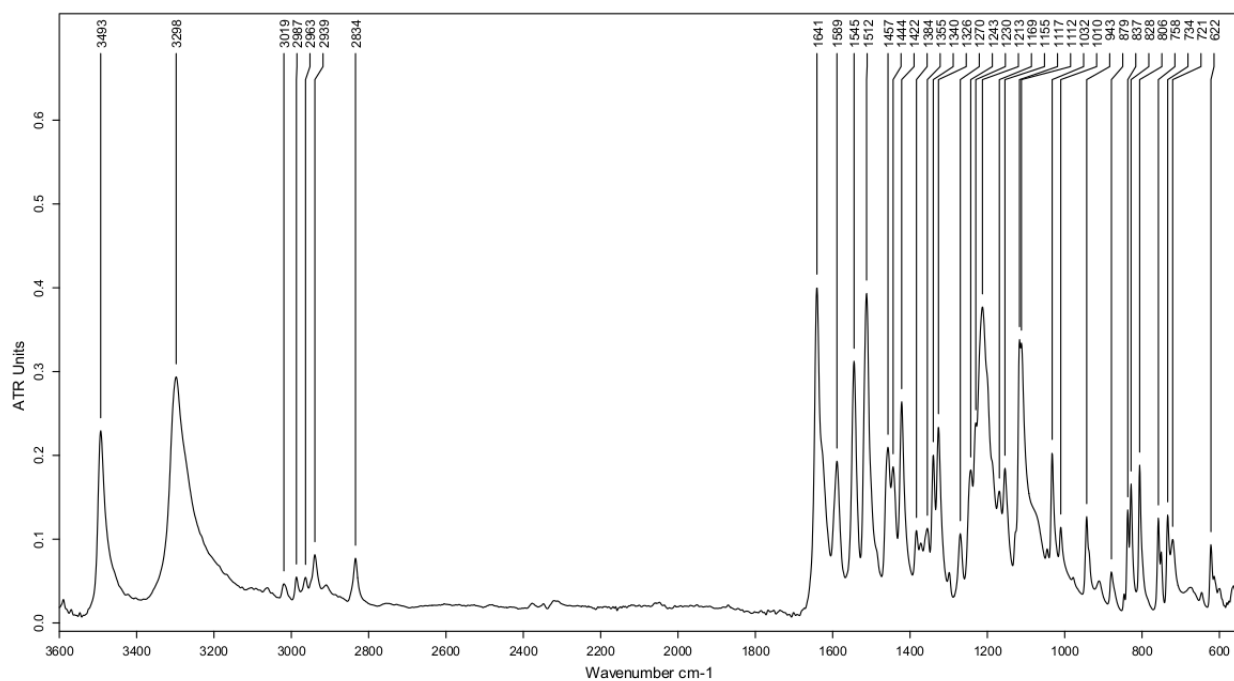

**Figure S36.** ATR-IR spectrum of **5f**

### 3. UV-Vis spectra absorbance spectra of the: Control - standard orange-red Fe(II) – 1,10 Phenanthroline complex; the tested hydrazone compounds

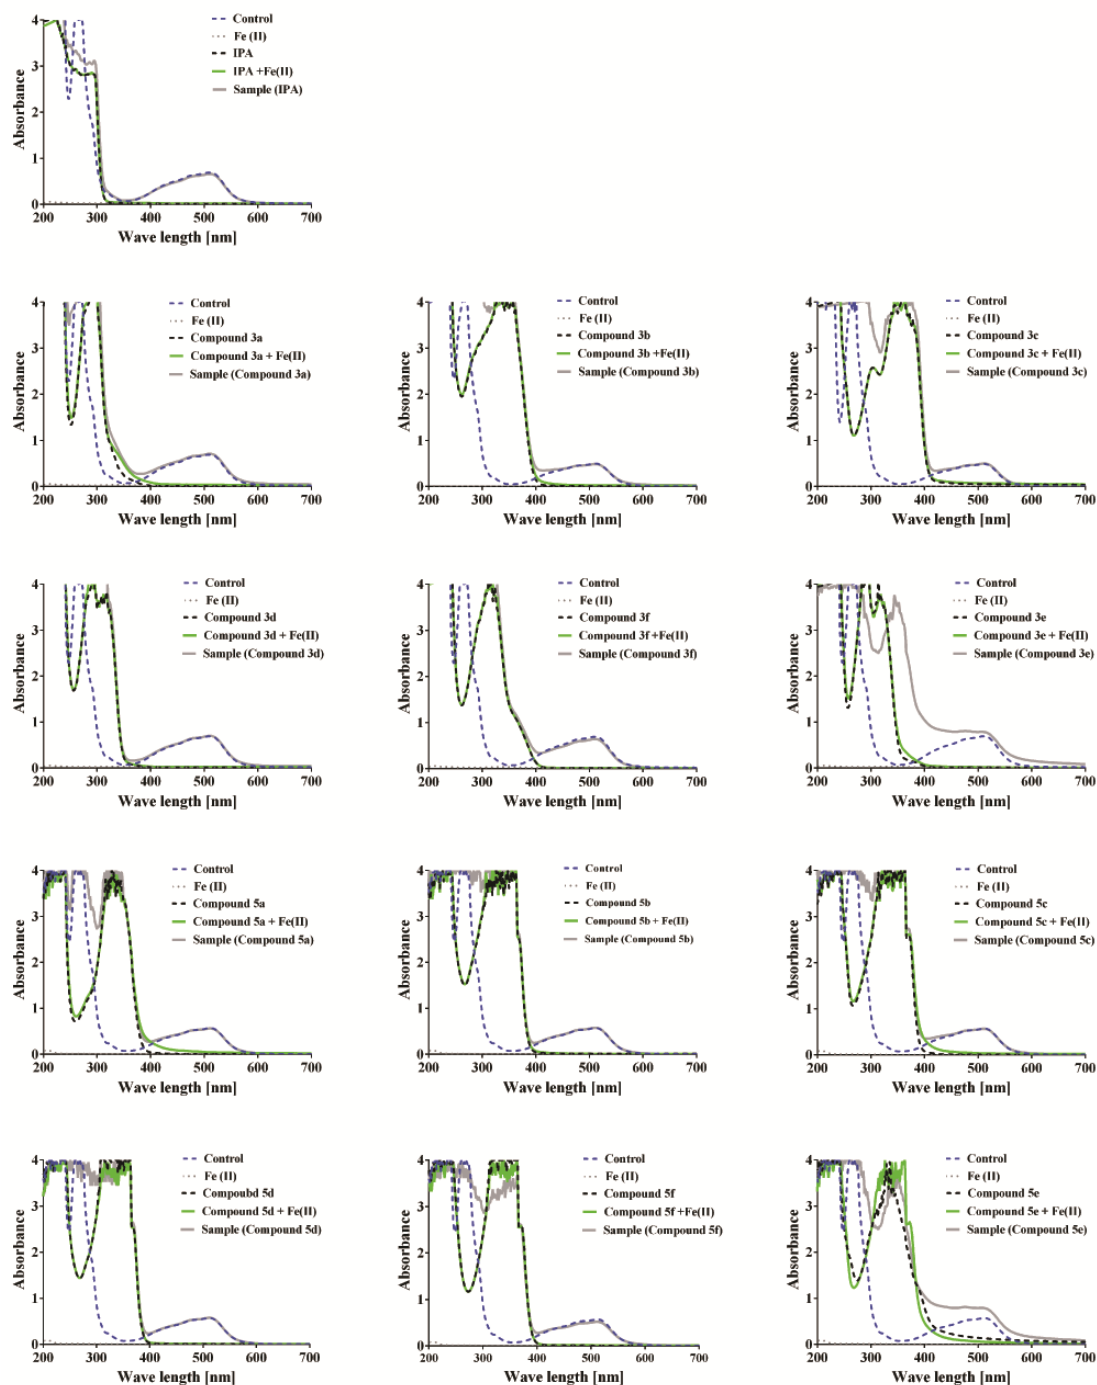

**Figure S37.** UV-Vis spectra absorbance spectra of the: Control - standard orange-red Fe(II) – 1,10 Phenanthroline complex; the tested hydrazone compounds [0.2 mmol/L] alone and in the presence of Fe(II) [0.05 mmol/L]; and the sample solution containing 1,10 phenanthroline [0.2 mmol/L], Fe(II) [0.05 mmol/L] and the hydrazone derivatives [0.2 mmol/L].



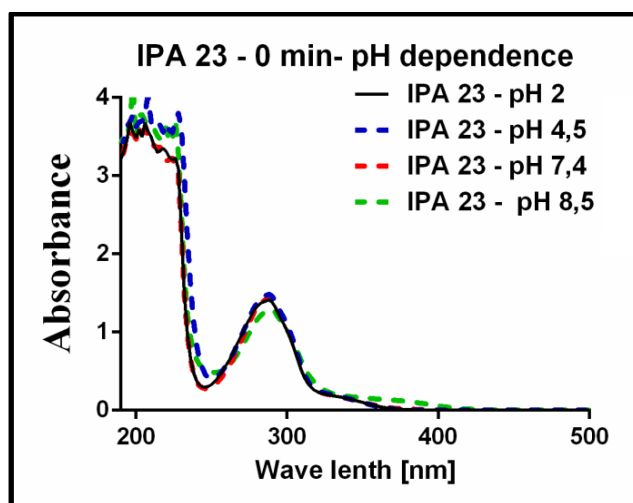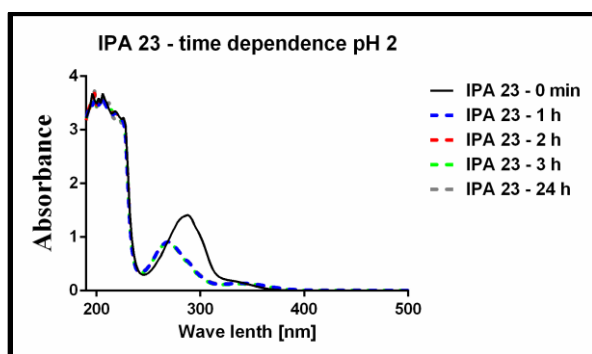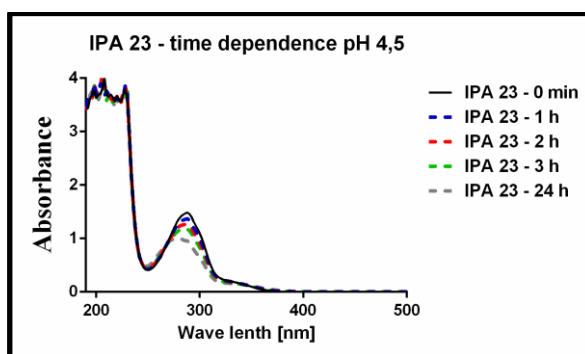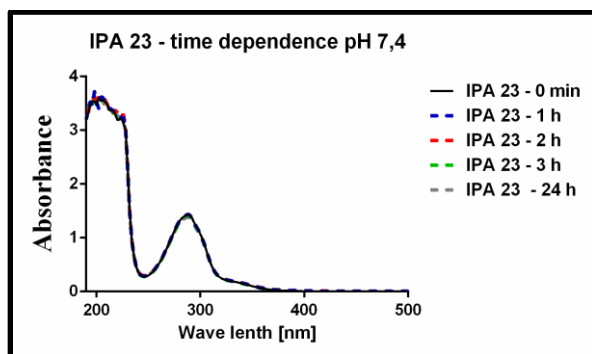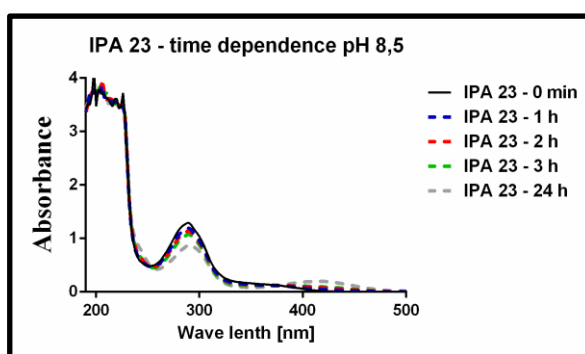

**Figure S38.** UV spectra of **3a** in buffers with pH 2, 4.5, 7.4 and 8.5 measured at the initial point (0 min) and after 1, 2, 3 and 24 h

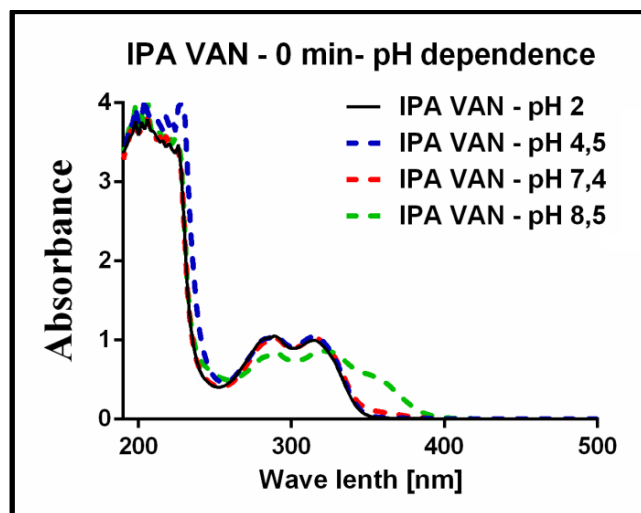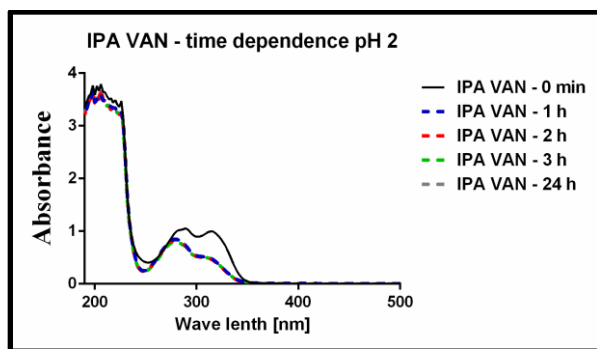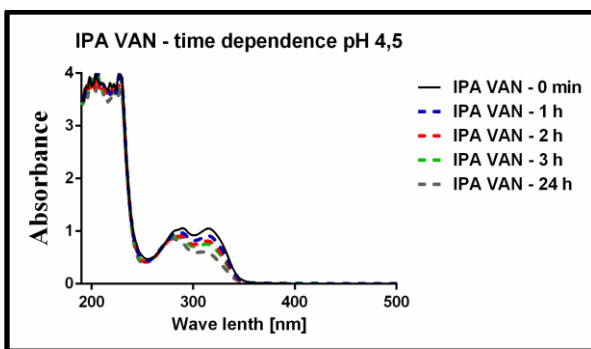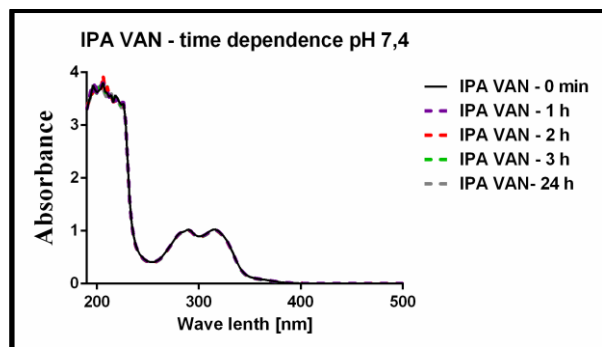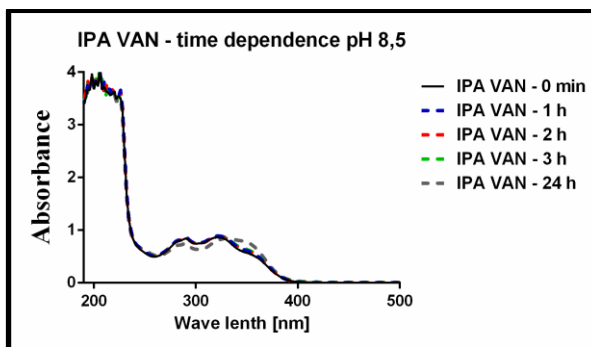

**Figure S39.** UV spectra of **3d** in buffers with pH 2, 4.5, 7.4 and 8.5 measured at the initial point (0 min) and after 1, 2, 3 and 24 h

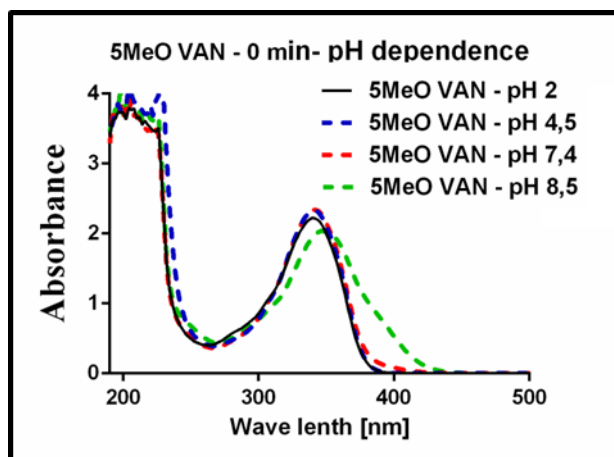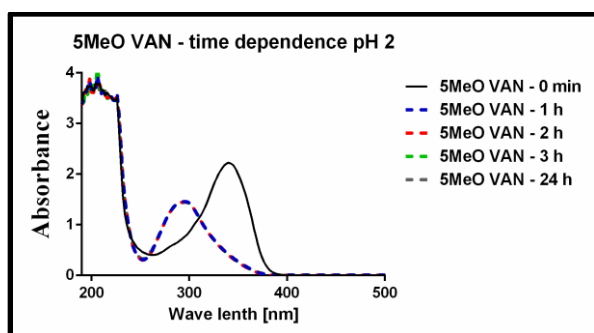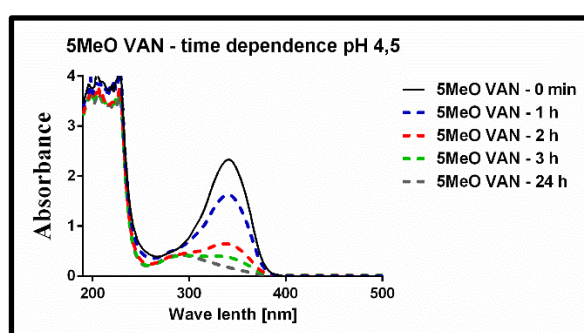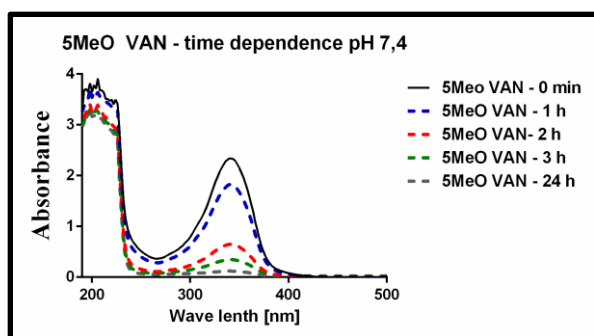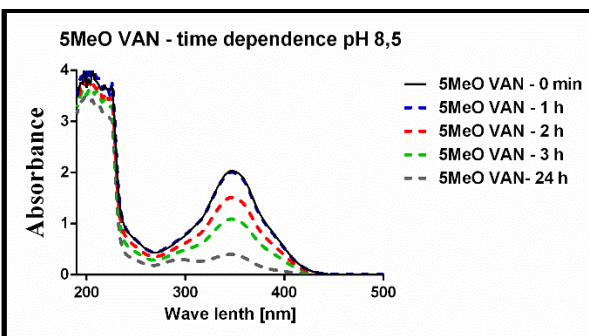

**Figure S40.** UV spectra of **5d** in buffers with pH 2, 4.5, 7.4 and 8.5 measured at the initial point (0 min) and after 1, 2, 3 and 24 h

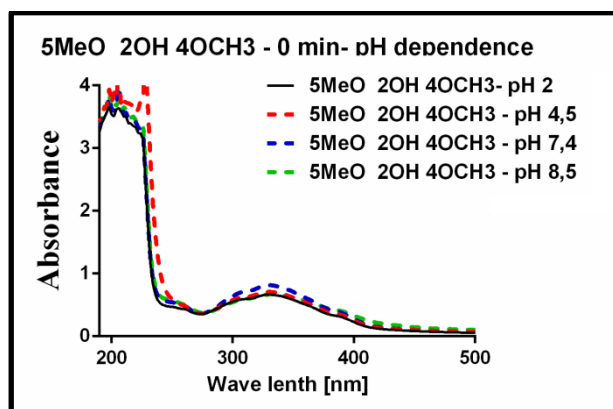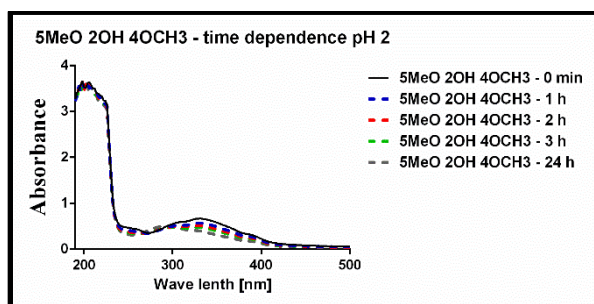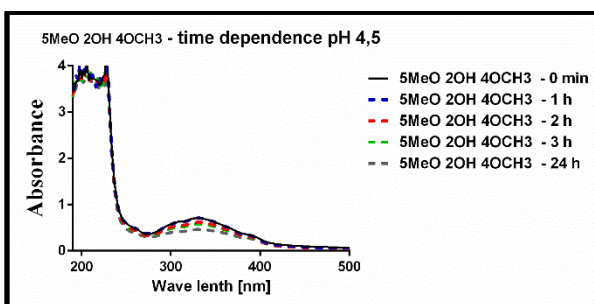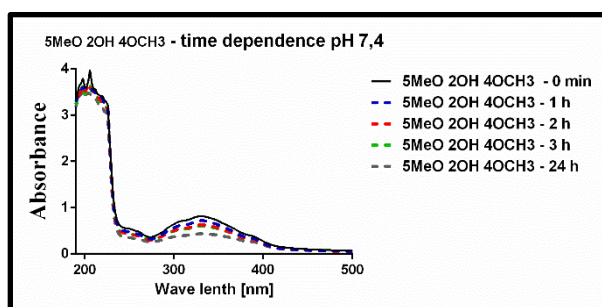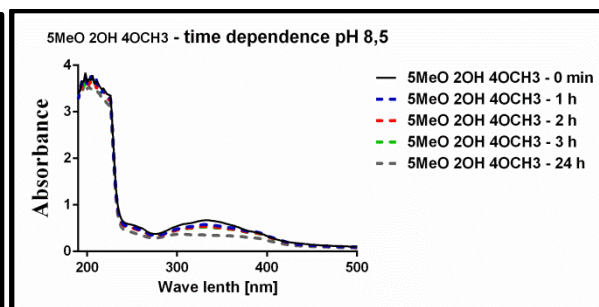

**Figure S41.** UV spectra of **5e** in buffers with pH 2, 4.5, 7.4 and 8.5 measured at the initial point (0 min) and after 1, 2, 3 and 24 h
