# Supplementary material for: New Indole-3-Propionic Acid and 5-Methoxy-Indole Carboxylic Acid Derived Hydrazone Hybrids as Multifunctional Neuroprotectors
Source: Antioxidants (Basel). 2023 Apr 21;12(4):977. doi: 10.3390/antiox12040977 (PMC10135567; doi:10.3390/antiox12040977)
Supplement: Supplementary file 1 [file antioxidants-12-00977-s001.zip]

Archive with 4 entries (4 files):
- antioxidants-2262553.pdf
- antioxidants-2262553.zip
- antioxidants-2262553-tex.zip
- antioxidants-2262553-supplementary.zip
