# Supplementary figures and images for: New Indole-3-Propionic Acid and 5-Methoxy-Indole Carboxylic Acid Derived Hydrazone Hybrids as Multifunctional Neuroprotectors
Source: MDPI journal article supplement (doi:10.3390/antiox12040977), 2023-04-21

5a

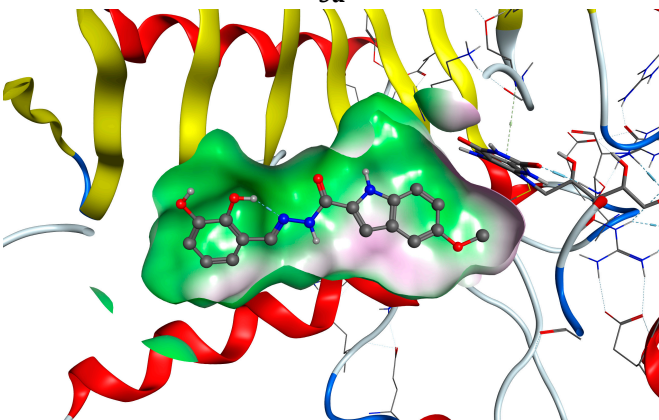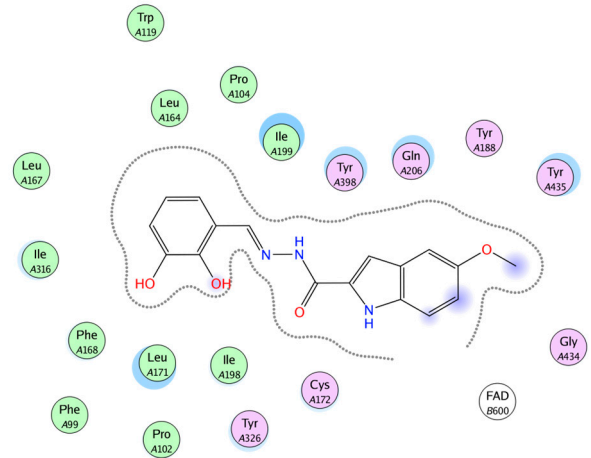

5b

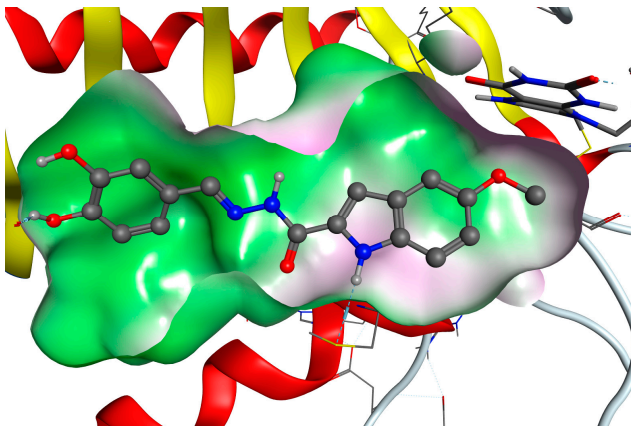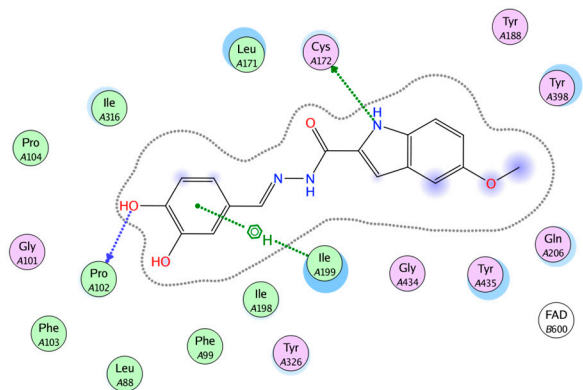

5f

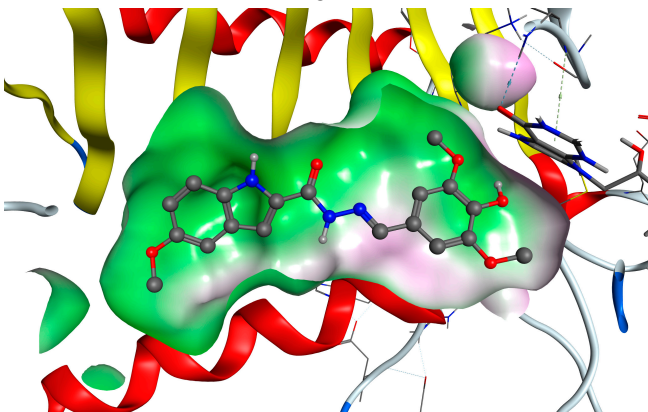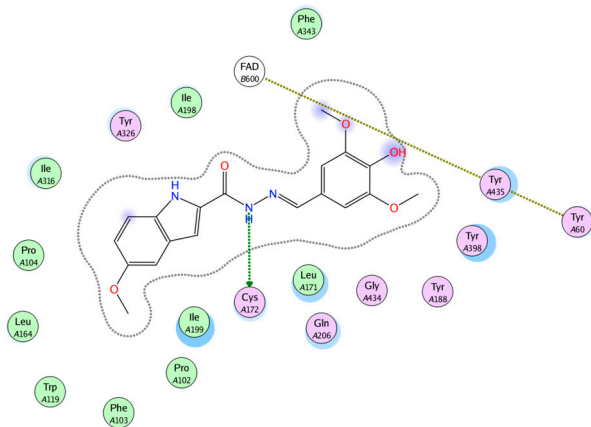

Supplement: s1 [file s1]

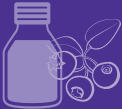

*antioxidants*

Supplement: s1 [file s1]

# Lecithin

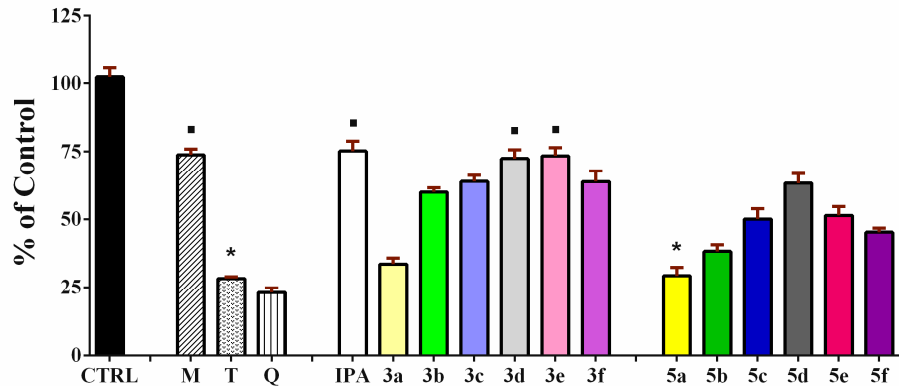

Supplement: s1 [file s1]

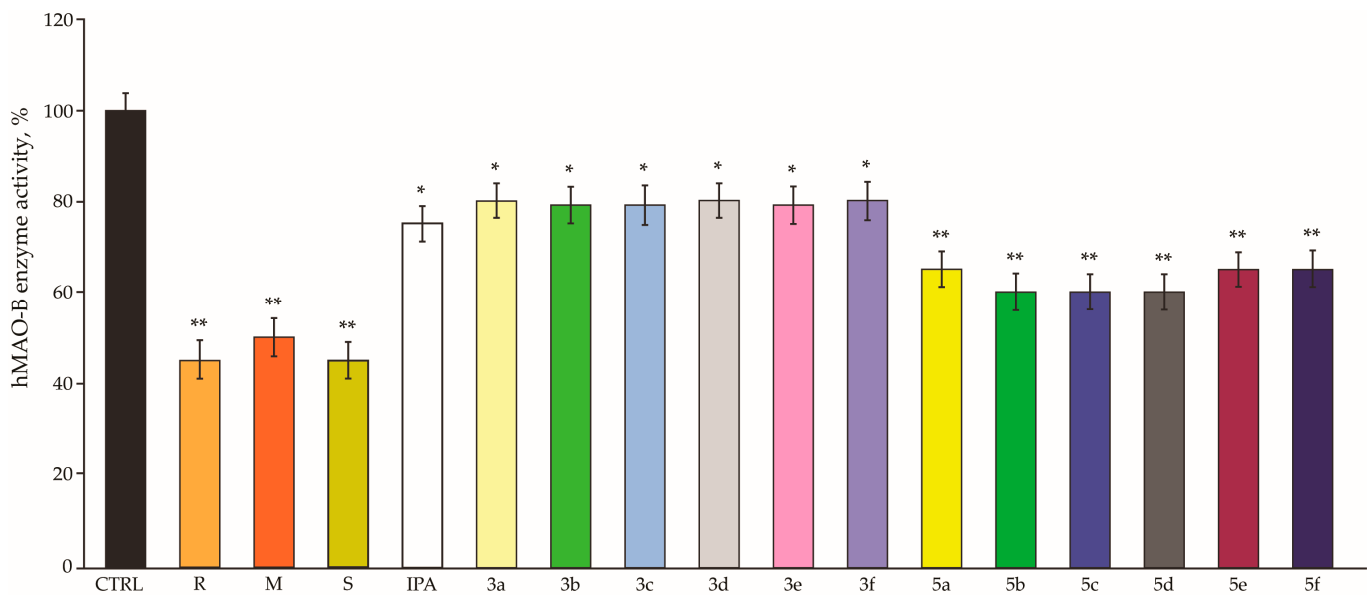

Supplement: s1 [file s1]

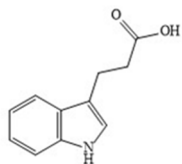

Indole-3-propionic acid

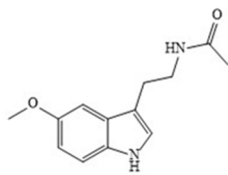

Melatonin

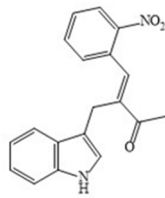

I

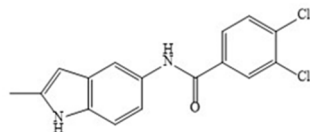

III

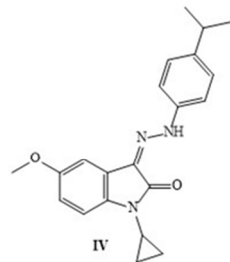

IV

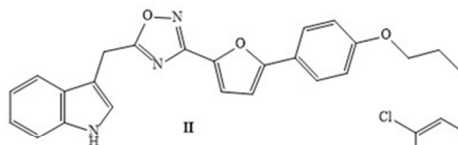

II

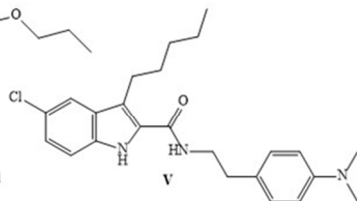

V

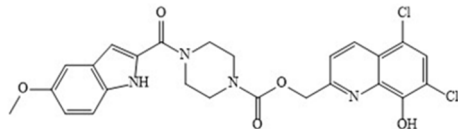

VI

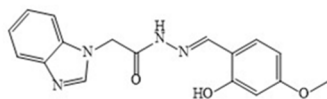

VII

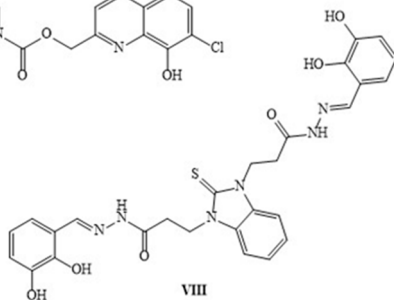

VIII

Supplement: s1 [file s1]

# Deoxyribose

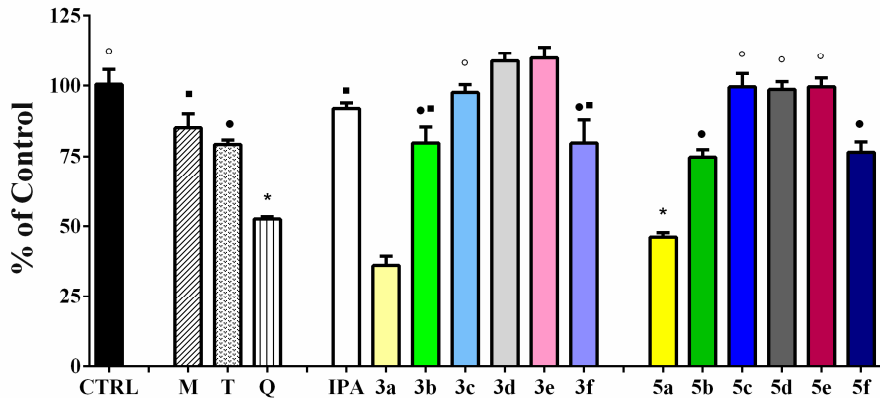

Supplement: s1 [file s1]

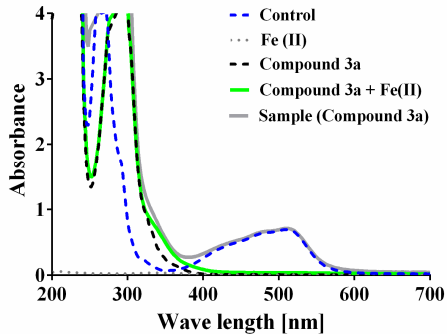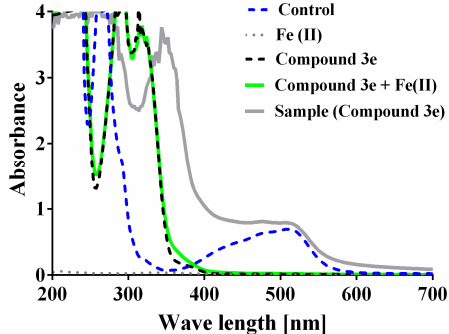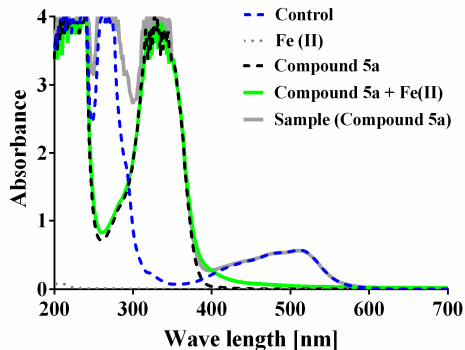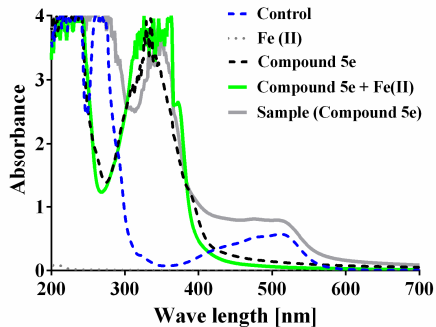

Supplement: s1 [file s1]

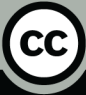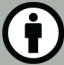

BY

Supplement: s1 [file s1]

**(a)**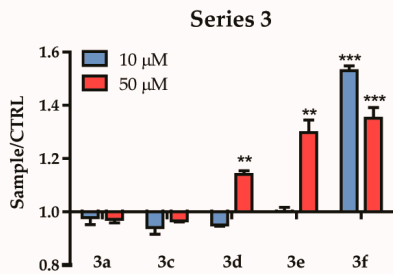**(b)**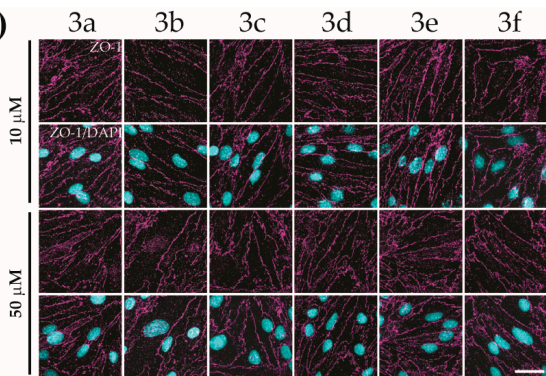**(c)**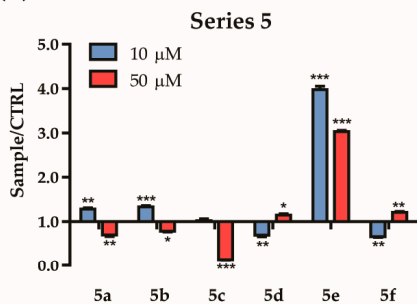**(d)**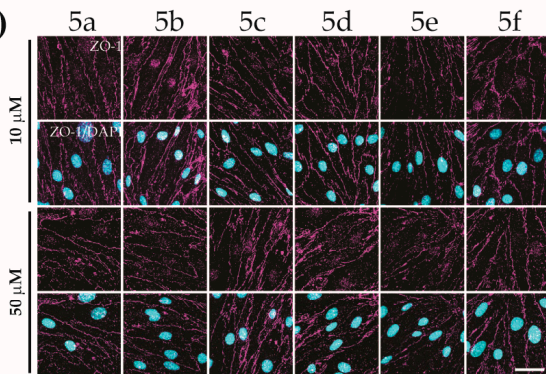**(e)**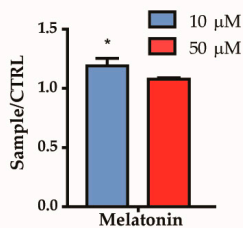**(f)**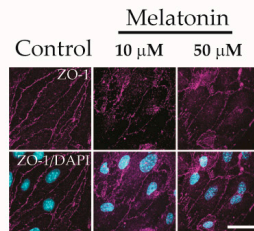

Supplement: s1 [file s1]

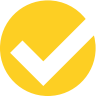

check for  
updates

Supplement: s1 [file s1]

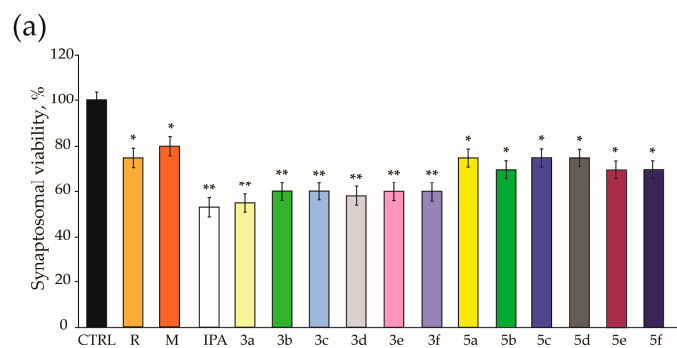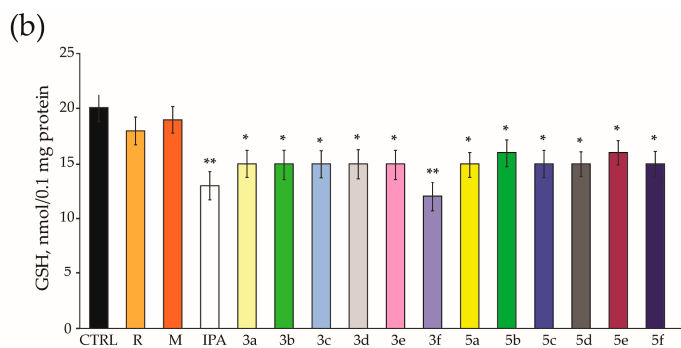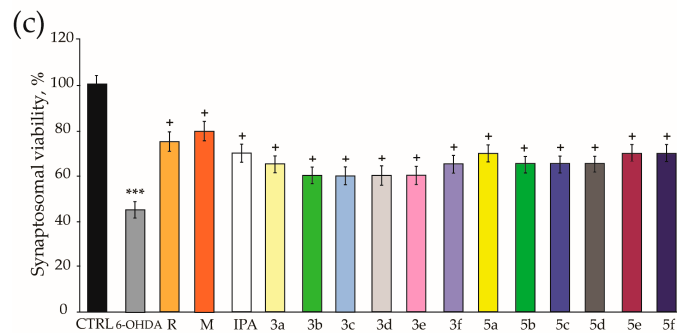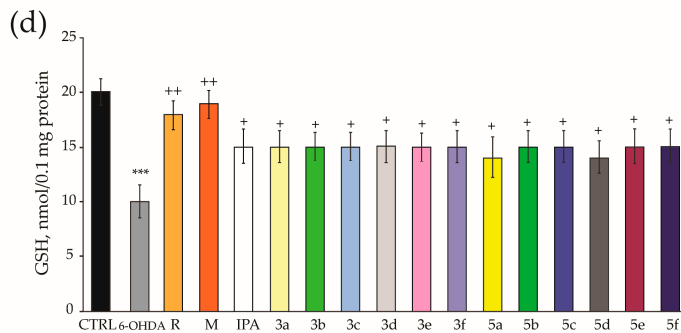

Supplement: s1 [file s1]

3a

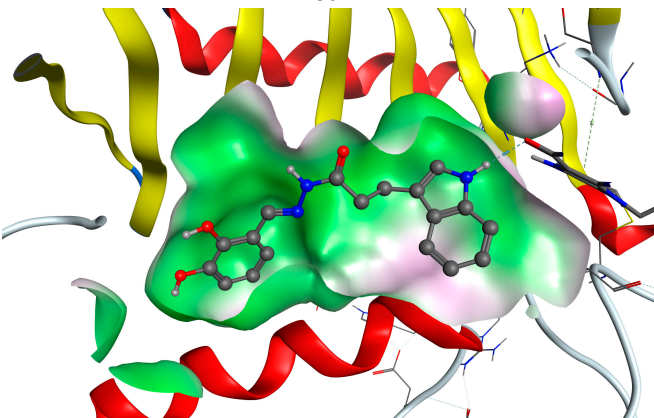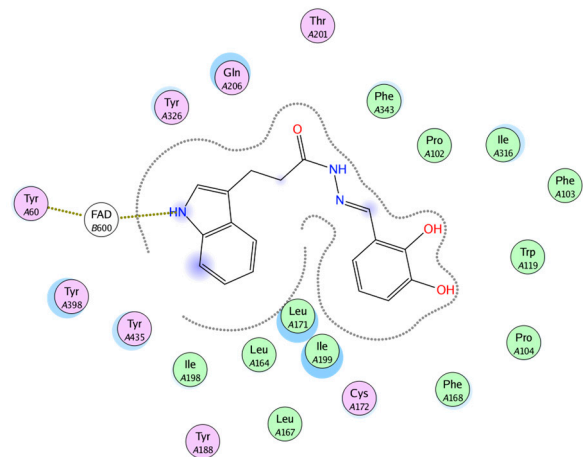

3b

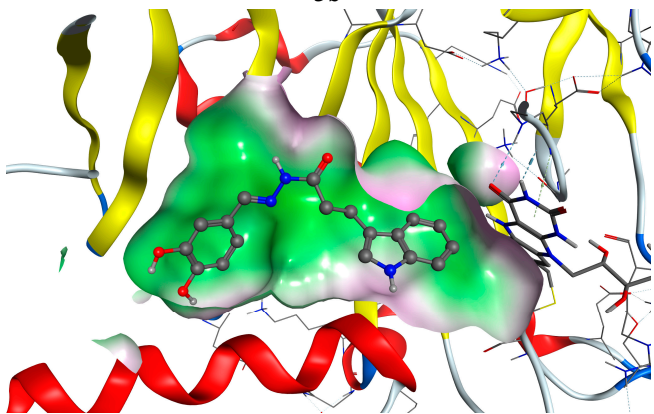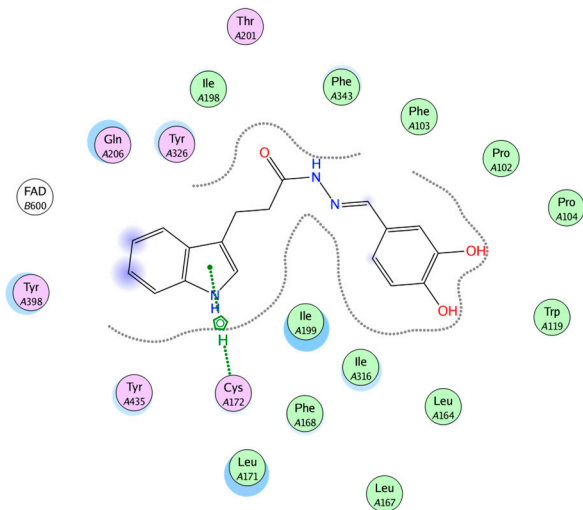

3f

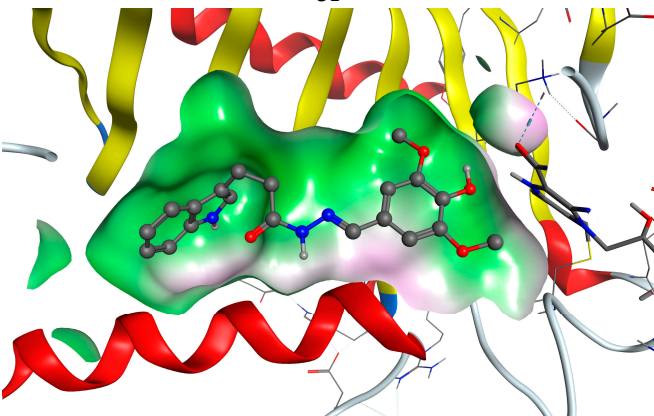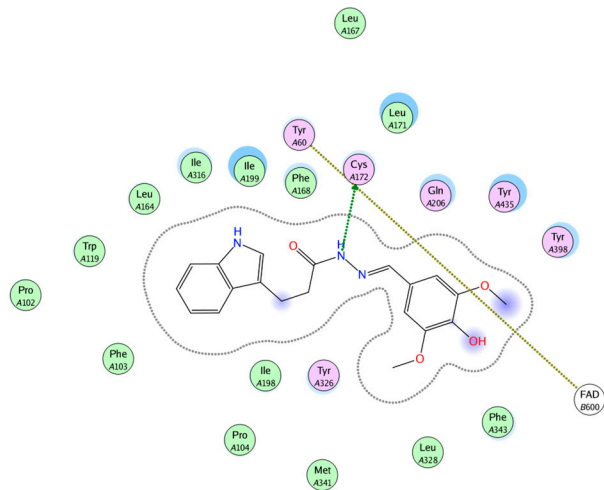

Supplement: s1 [file s1]

**Series I**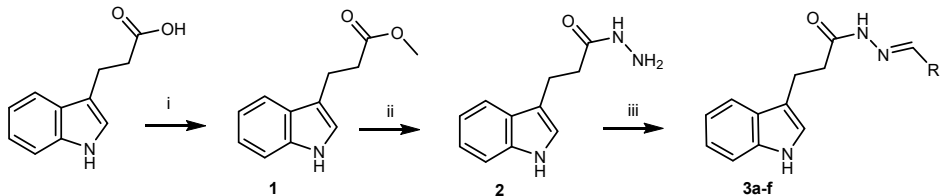**Series II**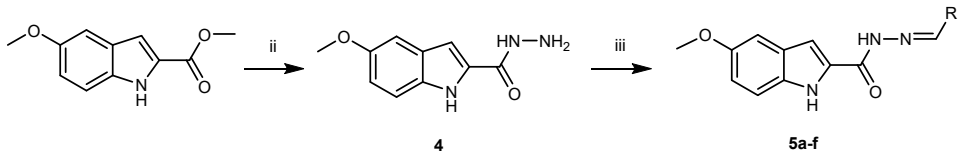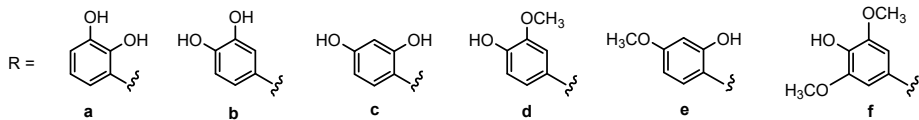

Supplement: s1 [file s1]

# O-phenantroline test

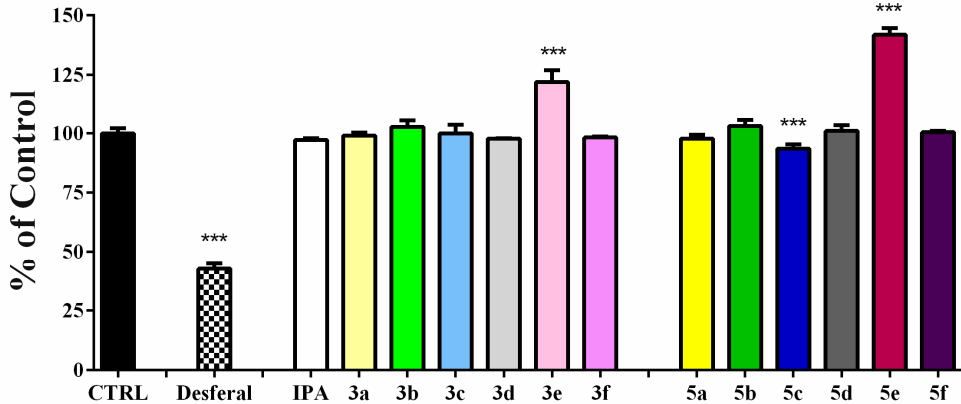

Supplement: s1 [file s1]

(a)

Ipa

3a

3b

3c

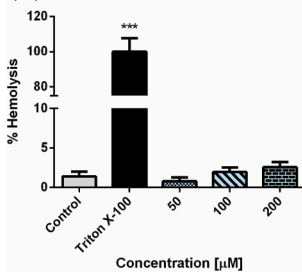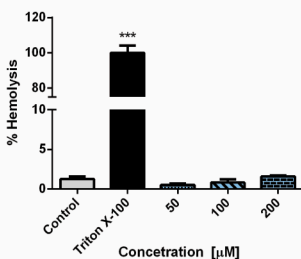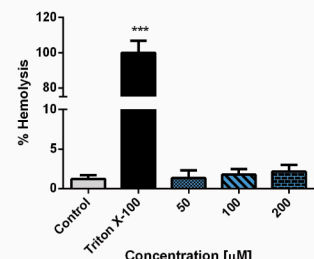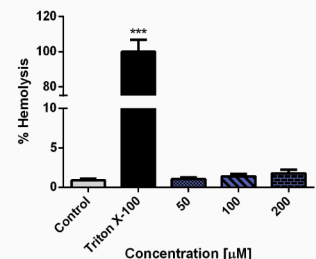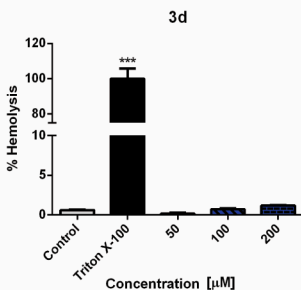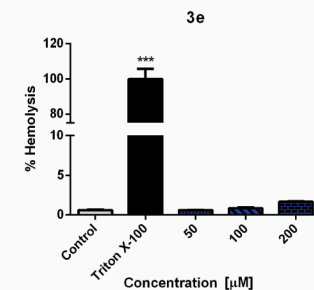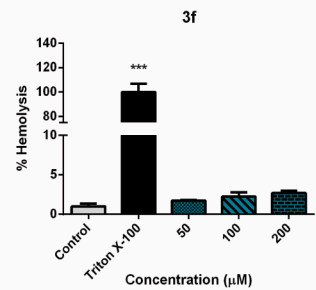

(b)

5a

5b

5c

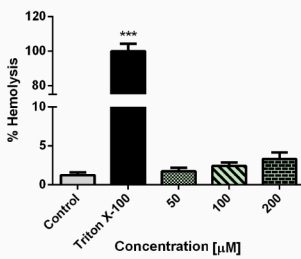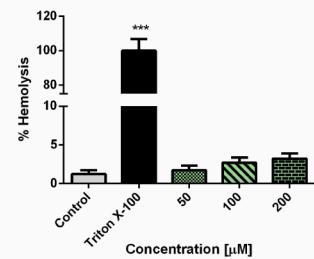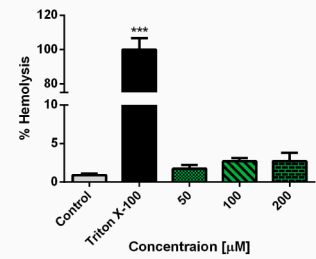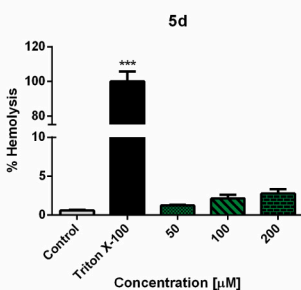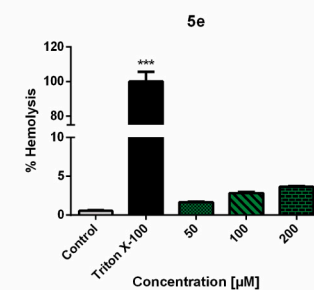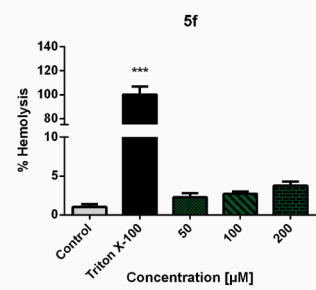

Supplement: s1 [file s1]

(a)

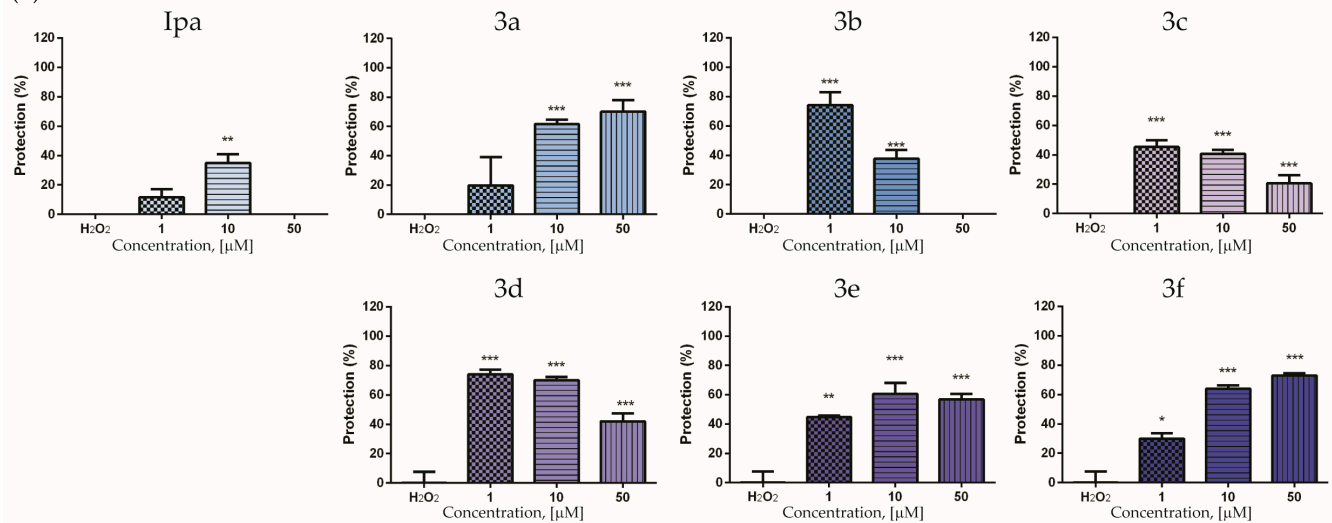

(b)

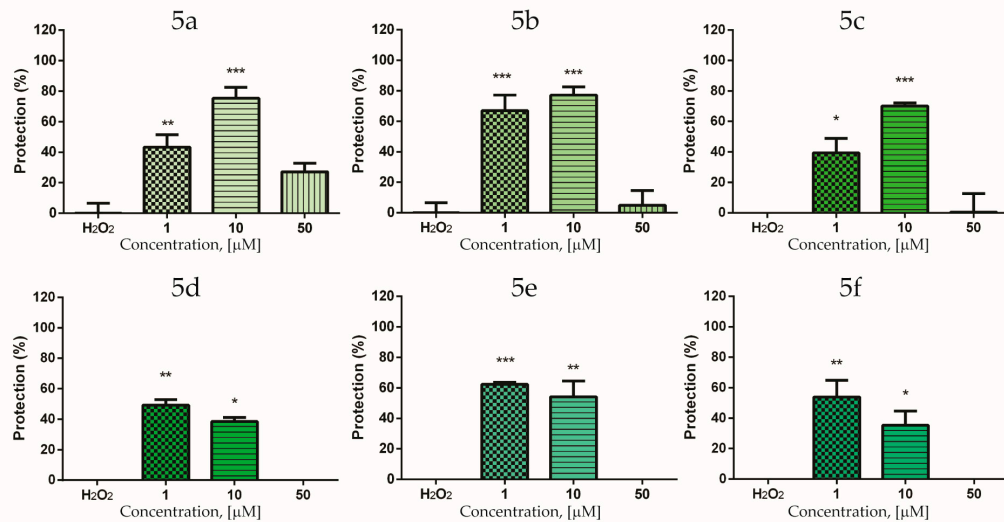

(c)

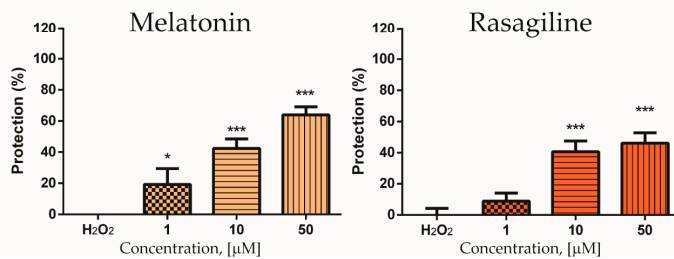

Supplement: s1 [file s1]
